# Supplementary material for: Crotonols A and B, two rare tigliane diterpenoid derivatives against K562 cells from Croton tiglium
Source: Royal Society of Chemistry journal article supplement (doi:10.1039/c8ob02519c), 2018-12-06

## Supporting Information

### Crotonols A and B, Two Rare Tigliane Diterpenoid Derivatives

#### Against K562 cells from *Croton tiglium*

Junfeng Wang,<sup>a,b,†</sup> Li Qin,<sup>a,†</sup> Biqing Zhao,<sup>a,†</sup> Liang Cai,<sup>c</sup> Zhenping Zhong,<sup>d</sup> Yonghong Liu,<sup>b</sup>  
and Xiaojiang Zhou<sup>a,\*</sup>

#### Affiliation

<sup>a</sup>College of Pharmacy, Hunan University of Chinese Medicine, Changsha 410208, People's Republic of China

<sup>b</sup>CAS Key Laboratory of Tropical Marine Bio-resources and Ecology/Guangdong Key Laboratory of Marine MateriaMedica/RNAM Center for Marine Microbiology, South China Sea Institute of Oceanology, Chinese Academy of Sciences, Guangzhou 510301, People's Republic of China

<sup>c</sup>Hunan Provincial Center for Disease Control and Prevention, Changsha 410005, People's Republic of China

<sup>d</sup>Yao Sheng Tang (Hu Nan) Pharmaceutical Co., Ltd, Anxiang 415600, People's Republic of China

### List of Supporting Information

| List of contents                                                                                                                            | Page |
|---------------------------------------------------------------------------------------------------------------------------------------------|------|
| <b>Figure S1.</b> Chemical structures of all possible configurations of compound <b>2</b> .....                                             | S3   |
| <b>Table S1.</b> Energies of dominative conformers at MMFF94 force field.....                                                               | S3   |
| <b>Table S2.</b> Energies of dominative conformers at B3LYP/6-311G(d,p) in methanol.....                                                    | S4   |
| <b>Table S3</b> Standard orientations of configurations at B3LYP/6-311G(d,p) level in methanol.....                                         | S6   |
| <b>Figure S2.</b> The crotonol A induced K562 cells apoptosis.....                                                                          | S25  |
| <b>Table S4.</b> Flow cytometry analyses of K562 cell apoptosis.....                                                                        | S26  |
| <b>Figure S3.</b> Up-regulation levels of PARP and bax as well as down-regulation level of bcl-2 in K562 cells treated with crotonol A..... | S27  |
| <b>Figure S4.</b> The <sup>1</sup> H NMR spectrum of crotonol A ( <b>1</b> ) in CD <sub>3</sub> OD.....                                     | S30  |
| <b>Figure S5.</b> The <sup>13</sup> C NMR spectrum of crotonol A ( <b>1</b> ) in CD <sub>3</sub> OD.....                                    | S31  |

|                                                                                                                                                 |     |
|-------------------------------------------------------------------------------------------------------------------------------------------------|-----|
| <b>Figure S6.</b> The HSQC spectrum of crotonol A ( <b>1</b> ) in CD <sub>3</sub> OD.....                                                       | S32 |
| <b>Figure S7.</b> The <sup>1</sup> H- <sup>1</sup> H COSY spectrum of crotonol A ( <b>1</b> ) in CD <sub>3</sub> OD.....                        | S33 |
| <b>Figure S8.</b> The HMBC spectrum of crotonol A ( <b>1</b> ) in CD <sub>3</sub> OD.....                                                       | S34 |
| <b>Figure S9.</b> The enlarged HMBC spectrum of crotonol A ( <b>1</b> ) about correlation H-14/C-7 and H-5/C-4.....                             | S35 |
| <b>Figure S10.</b> The enlarged HMBC spectrum of crotonol A ( <b>1</b> ) about the H-10/H-19b/H-8 signals and the C-13/C-4/C-9/C-6 signals..... | S36 |
| <b>Figure S11.</b> The NOESY spectrum of crotonol A ( <b>1</b> ) in CD <sub>3</sub> OD.....                                                     | S37 |
| <b>Figure S12.</b> The enlarged NOESY spectrum of crotonol A ( <b>1</b> ) about H-10/H-19b/H-8 signals.....                                     | S38 |
| <b>Figure S13.</b> The HRESIMS spectrum of soliseptide A ( <b>1</b> ).....                                                                      | S39 |
| <b>Figure S14.</b> The UV spectrum of crotonol A ( <b>1</b> ) in MeOH.....                                                                      | S40 |
| <b>Figure S15.</b> The <sup>1</sup> H NMR spectrum of crotonol B ( <b>2</b> ) in CD <sub>3</sub> OD.....                                        | S41 |
| <b>Figure S16.</b> The <sup>13</sup> C NMR spectrum of crotonol B ( <b>2</b> ) in CD <sub>3</sub> OD.....                                       | S42 |
| <b>Figure S17.</b> The HSQC spectrum of crotonol B ( <b>2</b> ) in CD <sub>3</sub> OD.....                                                      | S43 |
| <b>Figure S18.</b> The <sup>1</sup> H- <sup>1</sup> H COSY spectrum of crotonol B ( <b>2</b> ) in CD <sub>3</sub> OD.....                       | S44 |
| <b>Figure S19.</b> The HMBC spectrum of crotonol B ( <b>2</b> ) in CD <sub>3</sub> OD.....                                                      | S45 |
| <b>Figure S20.</b> The enlarged HMBC spectrum of crotonol B ( <b>2</b> ) about correlation H12/C13.....                                         | S46 |
| <b>Figure S21.</b> The enlarged HMBC spectrum of 2 between 135 and 141 ppm.....                                                                 | S47 |
| <b>Figure S22.</b> The NOESY spectrum of crotonol B ( <b>2</b> ) in CD <sub>3</sub> OD.....                                                     | S48 |
| <b>Figure S23.</b> The HRESIMS spectrum of crotonol B ( <b>2</b> ).....                                                                         | S49 |
| <b>Figure S24.</b> The UV spectrum of crotonol B ( <b>2</b> ) in MeOH.....                                                                      | S50 |
| <b>Figure S25.</b> The MMFF calculations picture between H-11 and H-12.....                                                                     | S51 |

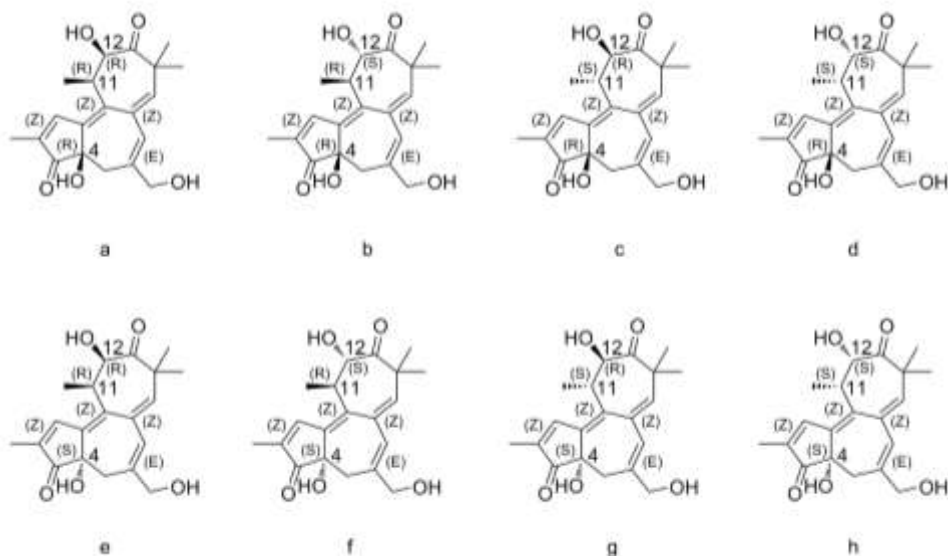

**Figure S1.** Chemical structures of all possible configurations of compound **2**.

## Energies and Coordinates

**Energies at MMFF94 force field.** Systematic conformational search was performed by Confab program at MMFF94 force field. Conformers for each configuration were obtained with filtration by RMSD threshold of 0.5 Å.

**Table S1.** Energies of dominative conformers at MMFF94 force field.

| Compound | Conformer | Energy (kcal/mol) |
|----------|-----------|-------------------|
| a        | 1         | 121.0342          |
| a        | 2         | 124.4055          |
| b        | 1         | 130.0022          |
| b        | 2         | 133.0971          |
| c        | <b>1</b>  | <b>119.5838</b>   |
| c        | <b>2</b>  | <b>122.8469</b>   |
| d        | 1         | 125.5501          |
| d        | 2         | 128.6177          |
| e        | 1         | 129.0301          |
| e        | 2         | 131.8892          |
| f        | 1         | 137.5435          |
| f        | 2         | 141.1494          |
| g        | 1         | 128.3384          |
| g        | 2         | 132.1104          |
| h        | 1         | 138.9677          |
| h        | 2         | 142.5042          |

**Energies at B3LYP theory level.** Structures for ECD calculations were optimized at B3LYP/6-311G(d,p) in methanol (**Table S2**).

**Table S2.** Energies of dominative conformers at B3LYP/6-311G(d,p) in methanol.

| Configuration | Conformer | Structure                                                                           | E (Hartree)         | E (kcal/mol)        | Population (%) |
|---------------|-----------|-------------------------------------------------------------------------------------|---------------------|---------------------|----------------|
| a             | 1         | 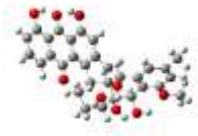   | -1152.926111        | -723472.052         | 5.72           |
| a             | 2         |    | -1152.928758        | -723473.7125        | 94.28          |
| b             | 1         |    | -1152.937779        | -723479.3738        | 60.86          |
| b             | 2         |   | -1152.937363        | -723479.1123        | 39.14          |
| c             | 1         |  | <b>-1152.954372</b> | <b>-723489.7858</b> | <b>33.83</b>   |
| c             | 2         |  | <b>-1152.955005</b> | <b>-723490.1832</b> | <b>66.17</b>   |
| d             | 1         |  | -1152.953997        | -723489.5503        | 43.37          |
| d             | 2         |  | -1152.954249        | -723489.7083        | 56.63          |

|   |   |                                                                                     |              |              |       |
|---|---|-------------------------------------------------------------------------------------|--------------|--------------|-------|
| e | 1 | 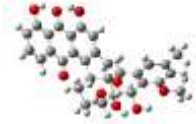   | -1152.953997 | -723489.5503 | 43.37 |
| e | 2 |    | -1152.954249 | -723489.7083 | 56.63 |
| f | 1 |    | -1152.954372 | -723489.7858 | 33.83 |
| f | 2 |    | -1152.955005 | -723490.1832 | 66.17 |
| g | 1 |  | -1152.937779 | -723479.3738 | 60.86 |
| g | 2 |  | -1152.937363 | -723479.1123 | 39.14 |
| h | 1 |  | -1152.926111 | -723472.052  | 5.72  |
| h | 2 |  | -1152.928758 | -723473.7125 | 94.28 |

---

## Coordinates at B3LYP theory level

**Table S3.** Standard orientations of configurations at B3LYP/6-311G(d,p) level in methanol.

| Conformer a-1    |                  |                |                         |           |           |
|------------------|------------------|----------------|-------------------------|-----------|-----------|
| Center<br>Number | Atomic<br>Number | Atomic<br>Type | Coordinates (Angstroms) |           |           |
|                  |                  |                | X                       | Y         | Z         |
| 1                | 6                | 0              | 1.335800                | -2.258582 | 0.415766  |
| 2                | 1                | 0              | 0.668274                | -3.019320 | 0.798823  |
| 3                | 6                | 0              | 2.523529                | -2.554890 | -0.168118 |
| 4                | 6                | 0              | 3.147068                | -1.297690 | -0.604297 |
| 5                | 6                | 0              | 2.288243                | -0.133746 | -0.052662 |
| 6                | 6                | 0              | 1.006514                | -0.835717 | 0.375027  |
| 7                | 6                | 0              | 2.150817                | 1.066597  | -0.978713 |
| 8                | 1                | 0              | 1.514075                | 0.807931  | -1.831656 |
| 9                | 1                | 0              | 3.141324                | 1.301769  | -1.381901 |
| 10               | 6                | 0              | 1.582702                | 2.242302  | -0.217986 |
| 11               | 6                | 0              | 0.371808                | 2.209934  | 0.339186  |
| 12               | 1                | 0              | 0.009196                | 3.105933  | 0.833839  |
| 13               | 6                | 0              | -0.609078               | 1.092235  | 0.230509  |
| 14               | 6                | 0              | -0.231733               | -0.307011 | 0.573678  |
| 15               | 6                | 0              | -1.835999               | 1.472839  | -0.197005 |
| 16               | 1                | 0              | -1.956628               | 2.545084  | -0.340925 |
| 17               | 6                | 0              | -2.772558               | -0.766351 | -0.908017 |
| 18               | 6                | 0              | -2.362138               | -1.692521 | 0.255427  |
| 19               | 1                | 0              | -1.916944               | -2.546959 | -0.256906 |
| 20               | 6                | 0              | -1.306379               | -1.158271 | 1.256286  |
| 21               | 1                | 0              | -0.823675               | -2.058989 | 1.633133  |
| 22               | 6                | 0              | 3.153967                | -3.889645 | -0.385034 |
| 23               | 1                | 0              | 3.358687                | -4.052132 | -1.447729 |
| 24               | 1                | 0              | 4.116962                | -3.950610 | 0.132303  |
| 25               | 1                | 0              | 2.515919                | -4.697941 | -0.025597 |
| 26               | 8                | 0              | 4.195458                | -1.150164 | -1.205859 |
| 27               | 8                | 0              | 2.964242                | 0.249877  | 1.171576  |
| 28               | 1                | 0              | 3.881889                | 0.444485  | 0.938497  |
| 29               | 6                | 0              | 2.489131                | 3.445454  | -0.101142 |
| 30               | 1                | 0              | 3.466409                | 3.107934  | 0.274089  |
| 31               | 1                | 0              | 2.666475                | 3.864332  | -1.098051 |
| 32               | 8                | 0              | 1.982541                | 4.510955  | 0.688620  |
| 33               | 1                | 0              | 1.933253                | 4.201513  | 1.600254  |
| 34               | 6                | 0              | -3.066031               | 0.723840  | -0.686298 |
| 35               | 6                | 0              | -3.464536               | 1.356134  | -2.039674 |
| 36               | 1                | 0              | -2.661791               | 1.260712  | -2.772080 |
| 37               | 1                | 0              | -4.352500               | 0.867105  | -2.443492 |
| 38               | 1                | 0              | -3.685112               | 2.416761  | -1.899862 |

|    |   |   |           |           |           |
|----|---|---|-----------|-----------|-----------|
| 39 | 6 | 0 | -4.261080 | 0.911545  | 0.288780  |
| 40 | 1 | 0 | -4.483585 | 1.977121  | 0.382009  |
| 41 | 1 | 0 | -5.152100 | 0.412982  | -0.100681 |
| 42 | 1 | 0 | -4.061342 | 0.539103  | 1.292424  |
| 43 | 8 | 0 | -2.879030 | -1.266963 | -2.008368 |
| 44 | 8 | 0 | -3.532642 | -2.228076 | 0.878248  |
| 45 | 1 | 0 | -3.953289 | -1.545453 | 1.411629  |
| 46 | 6 | 0 | -1.840667 | -0.461640 | 2.524516  |
| 47 | 1 | 0 | -2.293672 | 0.509907  | 2.335693  |
| 48 | 1 | 0 | -2.563771 | -1.101253 | 3.036060  |
| 49 | 1 | 0 | -1.008895 | -0.303940 | 3.214999  |

---

Conformer a-2

---

| Center<br>Number | Atomic<br>Number | Atomic<br>Type | Coordinates (Angstroms) |           |           |
|------------------|------------------|----------------|-------------------------|-----------|-----------|
|                  |                  |                | X                       | Y         | Z         |
| 1                | 6                | 0              | -1.233997               | 2.245313  | 0.345811  |
| 2                | 1                | 0              | -0.566689               | 3.015663  | 0.709480  |
| 3                | 6                | 0              | -2.424388               | 2.521425  | -0.240423 |
| 4                | 6                | 0              | -3.039379               | 1.251455  | -0.664133 |
| 5                | 6                | 0              | -2.184133               | 0.105622  | -0.068949 |
| 6                | 6                | 0              | -0.905391               | 0.820310  | 0.344588  |
| 7                | 6                | 0              | -2.036011               | -1.126969 | -0.950691 |
| 8                | 1                | 0              | -1.339625               | -0.920264 | -1.769459 |
| 9                | 1                | 0              | -3.011758               | -1.353346 | -1.383433 |
| 10               | 6                | 0              | -1.550549               | -2.272067 | -0.089166 |
| 11               | 6                | 0              | -0.361350               | -2.222907 | 0.518213  |
| 12               | 1                | 0              | -0.054818               | -3.054190 | 1.148612  |
| 13               | 6                | 0              | 0.660240                | -1.150297 | 0.320698  |
| 14               | 6                | 0              | 0.321485                | 0.277622  | 0.577927  |
| 15               | 6                | 0              | 1.870386                | -1.596606 | -0.084957 |
| 16               | 1                | 0              | 1.960302                | -2.679150 | -0.156462 |
| 17               | 6                | 0              | 2.865710                | 0.569809  | -0.932873 |
| 18               | 6                | 0              | 2.481942                | 1.578316  | 0.171346  |
| 19               | 1                | 0              | 2.056518                | 2.409018  | -0.393823 |
| 20               | 6                | 0              | 1.417305                | 1.138751  | 1.208846  |
| 21               | 1                | 0              | 0.960195                | 2.074770  | 1.527433  |
| 22               | 6                | 0              | -3.059918               | 3.847093  | -0.491534 |
| 23               | 1                | 0              | -3.282543               | 3.971188  | -1.555665 |
| 24               | 1                | 0              | -4.014573               | 3.923916  | 0.039037  |
| 25               | 1                | 0              | -2.417760               | 4.667876  | -0.169957 |
| 26               | 8                | 0              | -4.050283               | 1.094908  | -1.317695 |
| 27               | 8                | 0              | -2.951400               | -0.245723 | 1.126242  |
| 28               | 1                | 0              | -2.320268               | -0.414941 | 1.836274  |
| 29               | 6                | 0              | -2.511429               | -3.412682 | 0.136295  |
| 30               | 1                | 0              | -2.614457               | -4.004543 | -0.780878 |

---

|    |   |   |           |           |           |
|----|---|---|-----------|-----------|-----------|
| 31 | 1 | 0 | -2.120978 | -4.075041 | 0.918657  |
| 32 | 8 | 0 | -3.827967 | -2.955180 | 0.463713  |
| 33 | 1 | 0 | -3.730873 | -2.101900 | 0.914825  |
| 34 | 6 | 0 | 3.117286  | -0.913496 | -0.623726 |
| 35 | 6 | 0 | 3.490275  | -1.636692 | -1.938502 |
| 36 | 1 | 0 | 2.687691  | -1.561189 | -2.673423 |
| 37 | 1 | 0 | 4.390330  | -1.198768 | -2.372777 |
| 38 | 1 | 0 | 3.680590  | -2.693142 | -1.736327 |
| 39 | 6 | 0 | 4.311976  | -1.077849 | 0.356636  |
| 40 | 1 | 0 | 4.508371  | -2.141986 | 0.506984  |
| 41 | 1 | 0 | 5.212846  | -0.624681 | -0.064255 |
| 42 | 1 | 0 | 4.128458  | -0.646331 | 1.339728  |
| 43 | 8 | 0 | 2.988901  | 1.000412  | -2.060388 |
| 44 | 8 | 0 | 3.667867  | 2.121082  | 0.755937  |
| 45 | 1 | 0 | 4.076254  | 1.460005  | 1.324753  |
| 46 | 6 | 0 | 1.941597  | 0.508873  | 2.515248  |
| 47 | 1 | 0 | 2.365346  | -0.485006 | 2.384202  |
| 48 | 1 | 0 | 2.687847  | 1.158075  | 2.978868  |
| 49 | 1 | 0 | 1.112698  | 0.419799  | 3.221225  |

---

Conformer b-1

---

| Center<br>Number | Atomic<br>Number | Atomic<br>Type | Coordinates (Angstroms) |           |           |
|------------------|------------------|----------------|-------------------------|-----------|-----------|
|                  |                  |                | X                       | Y         | Z         |
| 1                | 6                | 0              | 1.240941                | -2.194196 | 0.470726  |
| 2                | 1                | 0              | 0.544175                | -2.938949 | 0.830959  |
| 3                | 6                | 0              | 2.424416                | -2.507234 | -0.115584 |
| 4                | 6                | 0              | 3.062542                | -1.262307 | -0.559686 |
| 5                | 6                | 0              | 2.207977                | -0.081224 | -0.038174 |
| 6                | 6                | 0              | 0.932708                | -0.768775 | 0.426673  |
| 7                | 6                | 0              | 2.054484                | 1.081813  | -1.009480 |
| 8                | 1                | 0              | 1.408764                | 0.786327  | -1.843719 |
| 9                | 1                | 0              | 3.039419                | 1.302889  | -1.433902 |
| 10               | 6                | 0              | 1.491941                | 2.289911  | -0.295895 |
| 11               | 6                | 0              | 0.291932                | 2.282238  | 0.285971  |
| 12               | 1                | 0              | -0.067073               | 3.202327  | 0.737177  |
| 13               | 6                | 0              | -0.682440               | 1.155503  | 0.255530  |
| 14               | 6                | 0              | -0.294781               | -0.226495 | 0.650920  |
| 15               | 6                | 0              | -1.920997               | 1.493722  | -0.171706 |
| 16               | 1                | 0              | -2.071966               | 2.552191  | -0.374589 |
| 17               | 6                | 0              | -2.781399               | -0.803457 | -0.719620 |
| 18               | 6                | 0              | -2.485788               | -1.626028 | 0.534109  |
| 19               | 1                | 0              | -3.406206               | -1.662550 | 1.131926  |
| 20               | 6                | 0              | -1.343277               | -1.037676 | 1.413311  |
| 21               | 1                | 0              | -0.858040               | -1.934921 | 1.790957  |
| 22               | 6                | 0              | 3.034169                | -3.852033 | -0.332746 |

---



|    |   |   |           |           |           |
|----|---|---|-----------|-----------|-----------|
| 23 | 1 | 0 | 3.231016  | -4.021842 | -1.395842 |
| 24 | 1 | 0 | 3.998765  | -3.926251 | 0.179996  |
| 25 | 1 | 0 | 2.386222  | -4.649586 | 0.033099  |
| 26 | 8 | 0 | 4.118998  | -1.129858 | -1.152495 |
| 27 | 8 | 0 | 2.896552  | 0.352892  | 1.161150  |
| 28 | 1 | 0 | 3.813172  | 0.529379  | 0.909962  |
| 29 | 6 | 0 | 2.390719  | 3.504070  | -0.267103 |
| 30 | 1 | 0 | 3.375545  | 3.197886  | 0.115334  |
| 31 | 1 | 0 | 2.551643  | 3.858828  | -1.291322 |
| 32 | 8 | 0 | 1.886805  | 4.615033  | 0.459325  |
| 33 | 1 | 0 | 1.862632  | 4.369586  | 1.391176  |
| 34 | 6 | 0 | -3.132258 | 0.678741  | -0.604331 |
| 35 | 6 | 0 | -3.547867 | 1.200393  | -1.999421 |
| 36 | 1 | 0 | -2.738260 | 1.087539  | -2.721181 |
| 37 | 1 | 0 | -4.415342 | 0.650943  | -2.370258 |
| 38 | 1 | 0 | -3.811100 | 2.258194  | -1.931835 |
| 39 | 6 | 0 | -4.328394 | 0.882743  | 0.364403  |
| 40 | 1 | 0 | -4.572500 | 1.946314  | 0.412600  |
| 41 | 1 | 0 | -5.208856 | 0.349884  | -0.004700 |
| 42 | 1 | 0 | -4.120125 | 0.541089  | 1.376450  |
| 43 | 8 | 0 | -2.722795 | -1.368393 | -1.795448 |
| 44 | 8 | 0 | -2.137664 | -2.942492 | 0.145161  |
| 45 | 1 | 0 | -2.238365 | -2.961029 | -0.821728 |
| 46 | 6 | 0 | -1.822271 | -0.283606 | 2.669448  |
| 47 | 1 | 0 | -2.299278 | 0.669668  | 2.446521  |
| 48 | 1 | 0 | -2.526765 | -0.904093 | 3.229849  |
| 49 | 1 | 0 | -0.966788 | -0.077900 | 3.317459  |

Conformer b-2

| Center<br>Number | Atomic<br>Number | Atomic<br>Type | Coordinates (Angstroms) |           |           |
|------------------|------------------|----------------|-------------------------|-----------|-----------|
|                  |                  |                | X                       | Y         | Z         |
| 1                | 6                | 0              | 1.068276                | -2.282904 | 0.308112  |
| 2                | 1                | 0              | 0.316655                | -3.027810 | 0.532546  |
| 3                | 6                | 0              | 2.262318                | -2.579272 | -0.264928 |
| 4                | 6                | 0              | 2.982659                | -1.322662 | -0.508057 |
| 5                | 6                | 0              | 2.161531                | -0.176007 | 0.131254  |
| 6                | 6                | 0              | 0.833936                | -0.849635 | 0.445719  |
| 7                | 6                | 0              | 2.114676                | 1.111910  | -0.679199 |
| 8                | 1                | 0              | 1.496617                | 0.962905  | -1.571420 |
| 9                | 1                | 0              | 3.123204                | 1.344968  | -1.029713 |
| 10               | 6                | 0              | 1.578483                | 2.245130  | 0.167320  |
| 11               | 6                | 0              | 0.347732                | 2.225266  | 0.687178  |
| 12               | 1                | 0              | 0.008651                | 3.088349  | 1.255270  |
| 13               | 6                | 0              | -0.676420               | 1.164181  | 0.472927  |
| 14               | 6                | 0              | -0.373556               | -0.275673 | 0.696184  |

|    |   |   |           |           |           |
|----|---|---|-----------|-----------|-----------|
| 15 | 6 | 0 | -1.875793 | 1.620207  | 0.044350  |
| 16 | 1 | 0 | -1.970558 | 2.702573  | -0.019451 |
| 17 | 6 | 0 | -2.819848 | -0.545807 | -0.825384 |
| 18 | 6 | 0 | -2.626107 | -1.528706 | 0.329457  |
| 19 | 1 | 0 | -3.571807 | -1.579763 | 0.885137  |
| 20 | 6 | 0 | -1.491053 | -1.118659 | 1.312559  |
| 21 | 1 | 0 | -1.064714 | -2.080205 | 1.590580  |
| 22 | 6 | 0 | 2.814486  | -3.914232 | -0.639285 |
| 23 | 1 | 0 | 3.055967  | -3.949046 | -1.706176 |
| 24 | 1 | 0 | 3.747328  | -4.111553 | -0.100913 |
| 25 | 1 | 0 | 2.110190  | -4.716410 | -0.415178 |
| 26 | 8 | 0 | 4.071682  | -1.172910 | -1.033330 |
| 27 | 8 | 0 | 2.806236  | 0.053714  | 1.409703  |
| 28 | 1 | 0 | 3.737444  | 0.236773  | 1.225740  |
| 29 | 6 | 0 | 2.509459  | 3.399418  | 0.431670  |
| 30 | 1 | 0 | 2.012754  | 4.152397  | 1.054852  |
| 31 | 1 | 0 | 3.392876  | 3.045118  | 0.971545  |
| 32 | 8 | 0 | 3.020858  | 3.982258  | -0.773883 |
| 33 | 1 | 0 | 2.265182  | 4.303975  | -1.278810 |
| 34 | 6 | 0 | -3.097451 | 0.930910  | -0.546081 |
| 35 | 6 | 0 | -3.406422 | 1.640120  | -1.885462 |
| 36 | 1 | 0 | -2.566059 | 1.565545  | -2.576507 |
| 37 | 1 | 0 | -4.281006 | 1.192924  | -2.361823 |
| 38 | 1 | 0 | -3.614730 | 2.696149  | -1.701038 |
| 39 | 6 | 0 | -4.335063 | 1.084186  | 0.379163  |
| 40 | 1 | 0 | -4.532882 | 2.146157  | 0.540537  |
| 41 | 1 | 0 | -5.216816 | 0.644726  | -0.094807 |
| 42 | 1 | 0 | -4.199895 | 0.617183  | 1.353024  |
| 43 | 8 | 0 | -2.744539 | -0.981179 | -1.958663 |
| 44 | 8 | 0 | -2.337470 | -2.808446 | -0.203710 |
| 45 | 1 | 0 | -2.396240 | -2.705990 | -1.168806 |
| 46 | 6 | 0 | -1.986009 | -0.501359 | 2.635427  |
| 47 | 1 | 0 | -2.416509 | 0.491445  | 2.513869  |
| 48 | 1 | 0 | -2.735904 | -1.153356 | 3.090990  |
| 49 | 1 | 0 | -1.148890 | -0.413028 | 3.332070  |

Conformer c-1

| Center<br>Number | Atomic<br>Number | Atomic<br>Type | Coordinates (Angstroms) |           |           |
|------------------|------------------|----------------|-------------------------|-----------|-----------|
|                  |                  |                | X                       | Y         | Z         |
| 1                | 6                | 0              | -1.211900               | -2.171010 | 0.529607  |
| 2                | 6                | 0              | -2.407679               | -2.534825 | -0.002404 |
| 3                | 6                | 0              | -2.884026               | -1.432918 | -0.847476 |
| 4                | 6                | 0              | -1.897341               | -0.251307 | -0.716590 |
| 5                | 6                | 0              | -0.785118               | -0.839766 | 0.129913  |
| 6                | 6                | 0              | -2.595449               | 0.917775  | -0.004475 |

|    |   |   |           |           |           |
|----|---|---|-----------|-----------|-----------|
| 7  | 6 | 0 | -1.761385 | 2.158592  | 0.216025  |
| 8  | 6 | 0 | -0.421986 | 2.246345  | 0.201883  |
| 9  | 6 | 0 | 0.599058  | 1.196960  | -0.006079 |
| 10 | 6 | 0 | 0.349888  | -0.192920 | 0.471679  |
| 11 | 6 | 0 | 1.742920  | 1.556878  | -0.622323 |
| 12 | 6 | 0 | 3.145641  | -0.540147 | -0.259634 |
| 13 | 6 | 0 | 2.830657  | -0.450208 | 1.225285  |
| 14 | 6 | 0 | 1.334681  | -0.809298 | 1.456623  |
| 15 | 6 | 0 | -3.152187 | -3.818190 | 0.155495  |
| 16 | 8 | 0 | -3.860823 | -1.409428 | -1.576756 |
| 17 | 8 | 0 | -1.431462 | 0.112637  | -2.014943 |
| 18 | 6 | 0 | -2.574352 | 3.412154  | 0.446281  |
| 19 | 8 | 0 | -3.454819 | 3.291729  | 1.572680  |
| 20 | 6 | 0 | 2.868420  | 0.680921  | -1.132722 |
| 21 | 6 | 0 | 4.194615  | 1.494050  | -1.107813 |
| 22 | 6 | 0 | 2.560104  | 0.248712  | -2.583530 |
| 23 | 8 | 0 | 3.653217  | -1.557546 | -0.692220 |
| 24 | 8 | 0 | 3.657680  | -1.337965 | 1.955504  |
| 25 | 6 | 0 | 0.949091  | -0.447351 | 2.904291  |
| 26 | 1 | 0 | -0.633101 | -2.809757 | 1.184974  |
| 27 | 1 | 0 | -3.472759 | 1.193679  | -0.603986 |
| 28 | 1 | 0 | -3.000483 | 0.567833  | 0.952486  |
| 29 | 1 | 0 | 0.000248  | 3.242903  | 0.312981  |
| 30 | 1 | 0 | 1.835688  | 2.599862  | -0.917384 |
| 31 | 1 | 0 | 3.025232  | 0.563627  | 1.584102  |
| 32 | 1 | 0 | 1.300526  | -1.896467 | 1.350557  |
| 33 | 1 | 0 | -2.603844 | -4.526786 | 0.777405  |
| 34 | 1 | 0 | -4.133251 | -3.644226 | 0.608958  |
| 35 | 1 | 0 | -3.335707 | -4.277979 | -0.820536 |
| 36 | 1 | 0 | -2.216927 | 0.188421  | -2.574406 |
| 37 | 1 | 0 | -3.234799 | 3.596107  | -0.406779 |
| 38 | 1 | 0 | -1.913300 | 4.279023  | 0.557172  |
| 39 | 1 | 0 | -2.903541 | 3.152384  | 2.351326  |
| 40 | 1 | 0 | 4.076625  | 2.390378  | -1.721422 |
| 41 | 1 | 0 | 4.460219  | 1.808708  | -0.095718 |
| 42 | 1 | 0 | 5.014857  | 0.900382  | -1.515621 |
| 43 | 1 | 0 | 2.454581  | 1.130650  | -3.219385 |
| 44 | 1 | 0 | 1.628761  | -0.318480 | -2.629087 |
| 45 | 1 | 0 | 3.369955  | -0.369956 | -2.973647 |
| 46 | 1 | 0 | 3.899881  | -2.037498 | 1.328658  |
| 47 | 1 | 0 | 0.935739  | 0.637265  | 3.043326  |
| 48 | 1 | 0 | -0.041627 | -0.834721 | 3.150260  |
| 49 | 1 | 0 | 1.674770  | -0.877437 | 3.597431  |

---

Conformer c-2

---

| Center<br>Number | Atomic<br>Number | Atomic<br>Type | Coordinates (Angstroms) |           |           |
|------------------|------------------|----------------|-------------------------|-----------|-----------|
|                  |                  |                | X                       | Y         | Z         |
| 1                | 6                | 0              | -1.098812               | -2.319068 | 0.291802  |
| 2                | 6                | 0              | -2.321245               | -2.628107 | -0.213153 |
| 3                | 6                | 0              | -2.894712               | -1.408606 | -0.795257 |
| 4                | 6                | 0              | -1.933562               | -0.231955 | -0.515987 |
| 5                | 6                | 0              | -0.742141               | -0.919475 | 0.122716  |
| 6                | 6                | 0              | -2.602407               | 0.754214  | 0.455078  |
| 7                | 6                | 0              | -1.789817               | 1.967751  | 0.836355  |
| 8                | 6                | 0              | -0.459679               | 2.117719  | 0.735939  |
| 9                | 6                | 0              | 0.573299                | 1.162682  | 0.281449  |
| 10               | 6                | 0              | 0.395787                | -0.300807 | 0.505301  |
| 11               | 6                | 0              | 1.661242                | 1.674848  | -0.329423 |
| 12               | 6                | 0              | 3.135992                | -0.398200 | -0.464431 |
| 13               | 6                | 0              | 2.930642                | -0.598568 | 1.029033  |
| 14               | 6                | 0              | 1.465116                | -1.049361 | 1.290493  |
| 15               | 6                | 0              | -3.013253               | -3.949445 | -0.250847 |
| 16               | 8                | 0              | -3.927925               | -1.290311 | -1.431652 |
| 17               | 8                | 0              | -1.584423               | 0.387432  | -1.752900 |
| 18               | 6                | 0              | -2.621351               | 3.132264  | 1.327825  |
| 19               | 8                | 0              | -3.566790               | 3.588670  | 0.350279  |
| 20               | 6                | 0              | 2.771541                | 0.955574  | -1.066580 |
| 21               | 6                | 0              | 2.378230                | 0.800227  | -2.552551 |
| 22               | 6                | 0              | 4.075926                | 1.797771  | -0.965733 |
| 23               | 8                | 0              | 3.629137                | -1.298991 | -1.116484 |
| 24               | 8                | 0              | 3.830480                | -1.575553 | 1.519881  |
| 25               | 6                | 0              | 1.177834                | -0.975164 | 2.803071  |
| 26               | 1                | 0              | -0.452919               | -3.044159 | 0.770749  |
| 27               | 1                | 0              | -2.907893               | 0.214804  | 1.362011  |
| 28               | 1                | 0              | -3.530251               | 1.105579  | -0.010078 |
| 29               | 1                | 0              | -0.061935               | 3.100960  | 0.978077  |
| 30               | 1                | 0              | 1.704530                | 2.757284  | -0.429439 |
| 31               | 1                | 0              | 3.128580                | 0.336869  | 1.558607  |
| 32               | 1                | 0              | 1.450532                | -2.099217 | 0.987184  |
| 33               | 1                | 0              | -3.244330               | -4.232111 | -1.282635 |
| 34               | 1                | 0              | -3.968276               | -3.902754 | 0.282086  |
| 35               | 1                | 0              | -2.404029               | -4.735201 | 0.197521  |
| 36               | 1                | 0              | -2.414947               | 0.534971  | -2.226361 |
| 37               | 1                | 0              | -3.229506               | 2.827654  | 2.185343  |
| 38               | 1                | 0              | -1.968034               | 3.950319  | 1.651214  |
| 39               | 1                | 0              | -3.063296               | 3.865860  | -0.424039 |
| 40               | 1                | 0              | 2.215027                | 1.784176  | -2.997849 |
| 41               | 1                | 0              | 3.173282                | 0.294153  | -3.102624 |
| 42               | 1                | 0              | 1.457196                | 0.223119  | -2.651840 |

| 43               | 1                | 0              | 3.893623                | 2.790852  | -1.383627 |  |
|------------------|------------------|----------------|-------------------------|-----------|-----------|--|
| 44               | 1                | 0              | 4.403028                | 1.920486  | 0.069500  |  |
| 45               | 1                | 0              | 4.880520                | 1.325628  | -1.532632 |  |
| 46               | 1                | 0              | 4.035026                | -2.142198 | 0.759648  |  |
| 47               | 1                | 0              | 1.145128                | 0.063896  | 3.142336  |  |
| 48               | 1                | 0              | 1.964281                | -1.495856 | 3.353208  |  |
| 49               | 1                | 0              | 0.219047                | -1.440850 | 3.040049  |  |
| Conformer d-1    |                  |                |                         |           |           |  |
| Center<br>Number | Atomic<br>Number | Atomic<br>Type | Coordinates (Angstroms) |           |           |  |
|                  |                  |                | X                       | Y         | Z         |  |
| 1                | 6                | 0              | 1.522517                | -2.162746 | -0.573557 |  |
| 2                | 1                | 0              | 0.969755                | -2.878737 | -1.168006 |  |
| 3                | 6                | 0              | 2.777110                | -2.397416 | -0.109175 |  |
| 4                | 6                | 0              | 3.202228                | -1.226048 | 0.665150  |  |
| 5                | 6                | 0              | 2.106435                | -0.143495 | 0.556588  |  |
| 6                | 6                | 0              | 0.997441                | -0.861100 | -0.190149 |  |
| 7                | 6                | 0              | 2.645232                | 1.048647  | -0.249693 |  |
| 8                | 1                | 0              | 3.537234                | 1.422800  | 0.270716  |  |
| 9                | 1                | 0              | 3.004409                | 0.691017  | -1.223864 |  |
| 10               | 6                | 0              | 1.684626                | 2.194547  | -0.448338 |  |
| 11               | 6                | 0              | 0.350854                | 2.169722  | -0.326547 |  |
| 12               | 1                | 0              | -0.150036               | 3.129294  | -0.420179 |  |
| 13               | 6                | 0              | -0.562702               | 1.049673  | -0.017679 |  |
| 14               | 6                | 0              | -0.220799               | -0.336583 | -0.449873 |  |
| 15               | 6                | 0              | -1.718738               | 1.368439  | 0.602794  |  |
| 16               | 1                | 0              | -1.883447               | 2.423480  | 0.804792  |  |
| 17               | 6                | 0              | -3.335689               | -0.477927 | 0.102780  |  |
| 18               | 6                | 0              | -2.461508               | -1.609725 | -0.436725 |  |
| 19               | 1                | 0              | -2.065290               | -2.183022 | 0.406865  |  |
| 20               | 6                | 0              | -1.251147               | -1.091799 | -1.272703 |  |
| 21               | 1                | 0              | -0.791198               | -2.012411 | -1.632897 |  |
| 22               | 6                | 0              | 3.625227                | -3.613569 | -0.276198 |  |
| 23               | 1                | 0              | 4.559068                | -3.367277 | -0.791503 |  |
| 24               | 1                | 0              | 3.109191                | -4.387952 | -0.845041 |  |
| 25               | 1                | 0              | 3.904519                | -4.023460 | 0.699352  |  |
| 26               | 8                | 0              | 4.216198                | -1.084960 | 1.327355  |  |
| 27               | 8                | 0              | 1.694702                | 0.235754  | 1.867700  |  |
| 28               | 1                | 0              | 2.504533                | 0.391909  | 2.373216  |  |
| 29               | 6                | 0              | 2.398262                | 3.495193  | -0.769598 |  |
| 30               | 1                | 0              | 3.134722                | 3.305604  | -1.564603 |  |
| 31               | 1                | 0              | 2.967943                | 3.816306  | 0.109468  |  |
| 32               | 8                | 0              | 1.557847                | 4.588235  | -1.108918 |  |
| 33               | 1                | 0              | 1.125531                | 4.378788  | -1.944730 |  |
| 34               | 6                | 0              | -2.800801               | 0.465311  | 1.187133  |  |

|    |   |   |           |           |           |
|----|---|---|-----------|-----------|-----------|
| 35 | 6 | 0 | -2.221337 | -0.352317 | 2.373627  |
| 36 | 1 | 0 | -1.326350 | -0.906875 | 2.092638  |
| 37 | 1 | 0 | -2.965675 | -1.051328 | 2.766134  |
| 38 | 1 | 0 | -1.945071 | 0.336879  | 3.174533  |
| 39 | 6 | 0 | -3.958451 | 1.342484  | 1.695835  |
| 40 | 1 | 0 | -3.588311 | 2.027281  | 2.462361  |
| 41 | 1 | 0 | -4.748258 | 0.729304  | 2.133720  |
| 42 | 1 | 0 | -4.395069 | 1.929429  | 0.886454  |
| 43 | 8 | 0 | -4.456657 | -0.361003 | -0.357548 |
| 44 | 8 | 0 | -3.248493 | -2.474856 | -1.230529 |
| 45 | 1 | 0 | -4.086283 | -2.003667 | -1.371187 |
| 46 | 6 | 0 | -1.702889 | -0.303270 | -2.514525 |
| 47 | 1 | 0 | -2.165003 | 0.651427  | -2.254990 |
| 48 | 1 | 0 | -2.423941 | -0.894378 | -3.081392 |
| 49 | 1 | 0 | -0.846964 | -0.097904 | -3.161212 |

---

Conformer d-2

---

| Center<br>Number | Atomic<br>Number | Atomic<br>Type | Coordinates (Angstroms) |           |           |
|------------------|------------------|----------------|-------------------------|-----------|-----------|
|                  |                  |                | X                       | Y         | Z         |
| 1                | 6                | 0              | -1.270091               | 2.306578  | -0.377069 |
| 2                | 1                | 0              | -0.648911               | 3.049237  | -0.860921 |
| 3                | 6                | 0              | -2.515279               | 2.574565  | 0.093785  |
| 4                | 6                | 0              | -3.048661               | 1.346797  | 0.695797  |
| 5                | 6                | 0              | -2.034301               | 0.206450  | 0.462160  |
| 6                | 6                | 0              | -0.855005               | 0.928470  | -0.162636 |
| 7                | 6                | 0              | -2.637124               | -0.825938 | -0.501490 |
| 8                | 1                | 0              | -3.562319               | -1.205200 | -0.053225 |
| 9                | 1                | 0              | -2.938467               | -0.321613 | -1.429719 |
| 10               | 6                | 0              | -1.762060               | -2.010657 | -0.827189 |
| 11               | 6                | 0              | -0.431158               | -2.101568 | -0.676079 |
| 12               | 1                | 0              | 0.011911                | -3.072746 | -0.885693 |
| 13               | 6                | 0              | 0.556203                | -1.100402 | -0.217461 |
| 14               | 6                | 0              | 0.327135                | 0.350481  | -0.471449 |
| 15               | 6                | 0              | 1.670735                | -1.585111 | 0.370415  |
| 16               | 1                | 0              | 1.748866                | -2.667032 | 0.437538  |
| 17               | 6                | 0              | 3.432533                | 0.189985  | 0.142598  |
| 18               | 6                | 0              | 2.648908                | 1.442931  | -0.248035 |
| 19               | 1                | 0              | 2.267074                | 1.918831  | 0.660226  |
| 20               | 6                | 0              | 1.431986                | 1.125361  | -1.170113 |
| 21               | 1                | 0              | 1.047719                | 2.114790  | -1.419249 |
| 22               | 6                | 0              | -3.264799               | 3.864564  | 0.077666  |
| 23               | 1                | 0              | -4.204626               | 3.759974  | -0.473673 |
| 24               | 1                | 0              | -2.680557               | 4.663182  | -0.381103 |
| 25               | 1                | 0              | -3.531051               | 4.166361  | 1.095445  |
| 26               | 8                | 0              | -4.088776               | 1.199347  | 1.314272  |

---

|    |   |   |           |           |           |
|----|---|---|-----------|-----------|-----------|
| 27 | 8 | 0 | -1.687086 | -0.371860 | 1.719059  |
| 28 | 1 | 0 | -2.520787 | -0.543119 | 2.178703  |
| 29 | 6 | 0 | -2.525277 | -3.219690 | -1.322055 |
| 30 | 1 | 0 | -1.826949 | -4.017028 | -1.599787 |
| 31 | 1 | 0 | -3.110337 | -2.959790 | -2.209826 |
| 32 | 8 | 0 | -3.490021 | -3.692536 | -0.371640 |
| 33 | 1 | 0 | -3.007492 | -3.932310 | 0.428092  |
| 34 | 6 | 0 | 2.809019  | -0.856102 | 1.077027  |
| 35 | 6 | 0 | 2.277203  | -0.169813 | 2.365391  |
| 36 | 1 | 0 | 1.433536  | 0.489294  | 2.163034  |
| 37 | 1 | 0 | 3.068880  | 0.406056  | 2.853398  |
| 38 | 1 | 0 | 1.937554  | -0.939971 | 3.061317  |
| 39 | 6 | 0 | 3.889443  | -1.882378 | 1.461919  |
| 40 | 1 | 0 | 3.456068  | -2.638750 | 2.120403  |
| 41 | 1 | 0 | 4.715161  | -1.400006 | 1.988079  |
| 42 | 1 | 0 | 4.294689  | -2.380274 | 0.579792  |
| 43 | 8 | 0 | 4.555333  | 0.060787  | -0.308847 |
| 44 | 8 | 0 | 3.510996  | 2.353907  | -0.899380 |
| 45 | 1 | 0 | 4.322719  | 1.853815  | -1.085219 |
| 46 | 6 | 0 | 1.867614  | 0.468813  | -2.491679 |
| 47 | 1 | 0 | 2.264792  | -0.537229 | -2.342417 |
| 48 | 1 | 0 | 2.638121  | 1.078128  | -2.966770 |
| 49 | 1 | 0 | 1.018686  | 0.398217  | -3.175165 |

Conformer e-1

| Center<br>Number | Atomic<br>Number | Atomic<br>Type | Coordinates (Angstroms) |           |           |
|------------------|------------------|----------------|-------------------------|-----------|-----------|
|                  |                  |                | X                       | Y         | Z         |
| 1                | 6                | 0              | -1.522517               | -2.162746 | -0.573557 |
| 2                | 1                | 0              | -0.969755               | -2.878737 | -1.168006 |
| 3                | 6                | 0              | -2.777110               | -2.397416 | -0.109175 |
| 4                | 6                | 0              | -3.202228               | -1.226048 | 0.665150  |
| 5                | 6                | 0              | -2.106435               | -0.143495 | 0.556588  |
| 6                | 6                | 0              | -0.997441               | -0.861100 | -0.190149 |
| 7                | 6                | 0              | -2.645232               | 1.048647  | -0.249693 |
| 8                | 1                | 0              | -3.537234               | 1.422800  | 0.270716  |
| 9                | 1                | 0              | -3.004409               | 0.691017  | -1.223864 |
| 10               | 6                | 0              | -1.684626               | 2.194547  | -0.448338 |
| 11               | 6                | 0              | -0.350854               | 2.169722  | -0.326547 |
| 12               | 1                | 0              | 0.150036                | 3.129294  | -0.420179 |
| 13               | 6                | 0              | 0.562702                | 1.049673  | -0.017679 |
| 14               | 6                | 0              | 0.220799                | -0.336583 | -0.449873 |
| 15               | 6                | 0              | 1.718738                | 1.368439  | 0.602794  |
| 16               | 1                | 0              | 1.883447                | 2.423480  | 0.804792  |
| 17               | 6                | 0              | 3.335689                | -0.477927 | 0.102780  |
| 18               | 6                | 0              | 2.461508                | -1.609725 | -0.436725 |

|    |   |   |           |           |           |
|----|---|---|-----------|-----------|-----------|
| 19 | 1 | 0 | 2.065290  | -2.183022 | 0.406865  |
| 20 | 6 | 0 | 1.251147  | -1.091799 | -1.272703 |
| 21 | 1 | 0 | 0.791198  | -2.012411 | -1.632897 |
| 22 | 6 | 0 | -3.625227 | -3.613569 | -0.276198 |
| 23 | 1 | 0 | -4.559068 | -3.367277 | -0.791503 |
| 24 | 1 | 0 | -3.109191 | -4.387952 | -0.845041 |
| 25 | 1 | 0 | -3.904519 | -4.023460 | 0.699352  |
| 26 | 8 | 0 | -4.216198 | -1.084960 | 1.327355  |
| 27 | 8 | 0 | -1.694702 | 0.235754  | 1.867700  |
| 28 | 1 | 0 | -2.504533 | 0.391909  | 2.373216  |
| 29 | 6 | 0 | -2.398262 | 3.495193  | -0.769598 |
| 30 | 1 | 0 | -3.134722 | 3.305604  | -1.564603 |
| 31 | 1 | 0 | -2.967943 | 3.816306  | 0.109468  |
| 32 | 8 | 0 | -1.557847 | 4.588235  | -1.108918 |
| 33 | 1 | 0 | -1.125531 | 4.378788  | -1.944730 |
| 34 | 6 | 0 | 2.800801  | 0.465311  | 1.187133  |
| 35 | 6 | 0 | 2.221337  | -0.352317 | 2.373627  |
| 36 | 1 | 0 | 1.326350  | -0.906875 | 2.092638  |
| 37 | 1 | 0 | 2.965675  | -1.051328 | 2.766134  |
| 38 | 1 | 0 | 1.945071  | 0.336879  | 3.174533  |
| 39 | 6 | 0 | 3.958451  | 1.342484  | 1.695835  |
| 40 | 1 | 0 | 3.588311  | 2.027281  | 2.462361  |
| 41 | 1 | 0 | 4.748258  | 0.729304  | 2.133720  |
| 42 | 1 | 0 | 4.395069  | 1.929429  | 0.886454  |
| 43 | 8 | 0 | 4.456657  | -0.361003 | -0.357548 |
| 44 | 8 | 0 | 3.248493  | -2.474856 | -1.230529 |
| 45 | 1 | 0 | 4.086283  | -2.003667 | -1.371187 |
| 46 | 6 | 0 | 1.702889  | -0.303270 | -2.514525 |
| 47 | 1 | 0 | 2.165003  | 0.651427  | -2.254990 |
| 48 | 1 | 0 | 2.423941  | -0.894378 | -3.081392 |
| 49 | 1 | 0 | 0.846964  | -0.097904 | -3.161212 |

---

Conformer e-2

---

| Center<br>Number | Atomic<br>Number | Atomic<br>Type | Coordinates (Angstroms) |           |           |
|------------------|------------------|----------------|-------------------------|-----------|-----------|
|                  |                  |                | X                       | Y         | Z         |
| 1                | 6                | 0              | -1.270091               | -2.306578 | -0.377069 |
| 2                | 1                | 0              | -0.648911               | -3.049237 | -0.860921 |
| 3                | 6                | 0              | -2.515279               | -2.574565 | 0.093785  |
| 4                | 6                | 0              | -3.048661               | -1.346797 | 0.695797  |
| 5                | 6                | 0              | -2.034301               | -0.206450 | 0.462160  |
| 6                | 6                | 0              | -0.855005               | -0.928470 | -0.162636 |
| 7                | 6                | 0              | -2.637124               | 0.825938  | -0.501490 |
| 8                | 1                | 0              | -3.562319               | 1.205200  | -0.053225 |
| 9                | 1                | 0              | -2.938467               | 0.321613  | -1.429719 |
| 10               | 6                | 0              | -1.762060               | 2.010657  | -0.827189 |

---



|    |   |   |           |           |           |
|----|---|---|-----------|-----------|-----------|
| 11 | 6 | 0 | -0.431158 | 2.101568  | -0.676079 |
| 12 | 1 | 0 | 0.011911  | 3.072746  | -0.885693 |
| 13 | 6 | 0 | 0.556203  | 1.100402  | -0.217461 |
| 14 | 6 | 0 | 0.327135  | -0.350481 | -0.471449 |
| 15 | 6 | 0 | 1.670735  | 1.585111  | 0.370415  |
| 16 | 1 | 0 | 1.748866  | 2.667032  | 0.437538  |
| 17 | 6 | 0 | 3.432533  | -0.189985 | 0.142598  |
| 18 | 6 | 0 | 2.648908  | -1.442931 | -0.248035 |
| 19 | 1 | 0 | 2.267074  | -1.918831 | 0.660226  |
| 20 | 6 | 0 | 1.431986  | -1.125361 | -1.170113 |
| 21 | 1 | 0 | 1.047719  | -2.114790 | -1.419249 |
| 22 | 6 | 0 | -3.264799 | -3.864564 | 0.077666  |
| 23 | 1 | 0 | -4.204626 | -3.759974 | -0.473673 |
| 24 | 1 | 0 | -2.680557 | -4.663182 | -0.381103 |
| 25 | 1 | 0 | -3.531051 | -4.166361 | 1.095445  |
| 26 | 8 | 0 | -4.088776 | -1.199347 | 1.314272  |
| 27 | 8 | 0 | -1.687086 | 0.371860  | 1.719059  |
| 28 | 1 | 0 | -2.520787 | 0.543119  | 2.178703  |
| 29 | 6 | 0 | -2.525277 | 3.219690  | -1.322055 |
| 30 | 1 | 0 | -1.826949 | 4.017028  | -1.599787 |
| 31 | 1 | 0 | -3.110337 | 2.959790  | -2.209826 |
| 32 | 8 | 0 | -3.490021 | 3.692536  | -0.371640 |
| 33 | 1 | 0 | -3.007492 | 3.932310  | 0.428092  |
| 34 | 6 | 0 | 2.809019  | 0.856102  | 1.077027  |
| 35 | 6 | 0 | 2.277203  | 0.169813  | 2.365391  |
| 36 | 1 | 0 | 1.433536  | -0.489294 | 2.163034  |
| 37 | 1 | 0 | 3.068880  | -0.406056 | 2.853398  |
| 38 | 1 | 0 | 1.937554  | 0.939971  | 3.061317  |
| 39 | 6 | 0 | 3.889443  | 1.882378  | 1.461919  |
| 40 | 1 | 0 | 3.456068  | 2.638750  | 2.120403  |
| 41 | 1 | 0 | 4.715161  | 1.400006  | 1.988079  |
| 42 | 1 | 0 | 4.294689  | 2.380274  | 0.579792  |
| 43 | 8 | 0 | 4.555333  | -0.060787 | -0.308847 |
| 44 | 8 | 0 | 3.510996  | -2.353907 | -0.899380 |
| 45 | 1 | 0 | 4.322719  | -1.853815 | -1.085219 |
| 46 | 6 | 0 | 1.867614  | -0.468813 | -2.491679 |
| 47 | 1 | 0 | 2.264792  | 0.537229  | -2.342417 |
| 48 | 1 | 0 | 2.638121  | -1.078128 | -2.966770 |
| 49 | 1 | 0 | 1.018686  | -0.398217 | -3.175165 |

---

Conformer f-1

---

| Center<br>Number | Atomic<br>Number | Atomic<br>Type | Coordinates (Angstroms) |           |           |
|------------------|------------------|----------------|-------------------------|-----------|-----------|
|                  |                  |                | X                       | Y         | Z         |
| 1                | 6                | 0              | 1.211900                | -2.171010 | 0.529607  |
| 2                | 6                | 0              | 2.407679                | -2.534825 | -0.002404 |

---

|    |   |   |           |           |           |
|----|---|---|-----------|-----------|-----------|
| 3  | 6 | 0 | 2.884026  | -1.432918 | -0.847476 |
| 4  | 6 | 0 | 1.897341  | -0.251307 | -0.716590 |
| 5  | 6 | 0 | 0.785118  | -0.839766 | 0.129913  |
| 6  | 6 | 0 | 2.595449  | 0.917775  | -0.004475 |
| 7  | 6 | 0 | 1.761385  | 2.158592  | 0.216025  |
| 8  | 6 | 0 | 0.421986  | 2.246345  | 0.201883  |
| 9  | 6 | 0 | -0.599058 | 1.196960  | -0.006079 |
| 10 | 6 | 0 | -0.349888 | -0.192920 | 0.471679  |
| 11 | 6 | 0 | -1.742920 | 1.556878  | -0.622323 |
| 12 | 6 | 0 | -3.145641 | -0.540147 | -0.259634 |
| 13 | 6 | 0 | -2.830657 | -0.450208 | 1.225285  |
| 14 | 6 | 0 | -1.334681 | -0.809298 | 1.456623  |
| 15 | 6 | 0 | 3.152187  | -3.818190 | 0.155495  |
| 16 | 8 | 0 | 3.860823  | -1.409428 | -1.576756 |
| 17 | 8 | 0 | 1.431462  | 0.112637  | -2.014943 |
| 18 | 6 | 0 | 2.574352  | 3.412154  | 0.446281  |
| 19 | 8 | 0 | 3.454819  | 3.291729  | 1.572680  |
| 20 | 6 | 0 | -2.868420 | 0.680921  | -1.132722 |
| 21 | 6 | 0 | -4.194615 | 1.494050  | -1.107813 |
| 22 | 6 | 0 | -2.560104 | 0.248712  | -2.583530 |
| 23 | 8 | 0 | -3.653217 | -1.557546 | -0.692220 |
| 24 | 8 | 0 | -3.657680 | -1.337965 | 1.955504  |
| 25 | 6 | 0 | -0.949091 | -0.447351 | 2.904291  |
| 26 | 1 | 0 | 0.633101  | -2.809757 | 1.184974  |
| 27 | 1 | 0 | 3.472759  | 1.193679  | -0.603986 |
| 28 | 1 | 0 | 3.000483  | 0.567833  | 0.952486  |
| 29 | 1 | 0 | -0.000248 | 3.242903  | 0.312981  |
| 30 | 1 | 0 | -1.835688 | 2.599862  | -0.917384 |
| 31 | 1 | 0 | -3.025232 | 0.563627  | 1.584102  |
| 32 | 1 | 0 | -1.300526 | -1.896467 | 1.350557  |
| 33 | 1 | 0 | 2.603844  | -4.526786 | 0.777405  |
| 34 | 1 | 0 | 4.133251  | -3.644226 | 0.608958  |
| 35 | 1 | 0 | 3.335707  | -4.277979 | -0.820536 |
| 36 | 1 | 0 | 2.216927  | 0.188421  | -2.574406 |
| 37 | 1 | 0 | 3.234799  | 3.596107  | -0.406779 |
| 38 | 1 | 0 | 1.913300  | 4.279023  | 0.557172  |
| 39 | 1 | 0 | 2.903541  | 3.152384  | 2.351326  |
| 40 | 1 | 0 | -4.076625 | 2.390378  | -1.721422 |
| 41 | 1 | 0 | -4.460219 | 1.808708  | -0.095718 |
| 42 | 1 | 0 | -5.014857 | 0.900382  | -1.515621 |
| 43 | 1 | 0 | -2.454581 | 1.130650  | -3.219385 |
| 44 | 1 | 0 | -1.628761 | -0.318480 | -2.629087 |
| 45 | 1 | 0 | -3.369955 | -0.369956 | -2.973647 |
| 46 | 1 | 0 | -3.899881 | -2.037498 | 1.328658  |

---

| 47               | 1                | 0              | -0.935739               | 0.637265  | 3.043326  |
|------------------|------------------|----------------|-------------------------|-----------|-----------|
| 48               | 1                | 0              | 0.041627                | -0.834721 | 3.150260  |
| 49               | 1                | 0              | -1.674770               | -0.877437 | 3.597431  |
| Conformer f-2    |                  |                |                         |           |           |
| Center<br>Number | Atomic<br>Number | Atomic<br>Type | Coordinates (Angstroms) |           |           |
|                  |                  |                | X                       | Y         | Z         |
| 1                | 6                | 0              | 1.098812                | -2.319068 | 0.291802  |
| 2                | 6                | 0              | 2.321245                | -2.628107 | -0.213153 |
| 3                | 6                | 0              | 2.894712                | -1.408606 | -0.795257 |
| 4                | 6                | 0              | 1.933562                | -0.231955 | -0.515987 |
| 5                | 6                | 0              | 0.742141                | -0.919475 | 0.122716  |
| 6                | 6                | 0              | 2.602407                | 0.754214  | 0.455078  |
| 7                | 6                | 0              | 1.789817                | 1.967751  | 0.836355  |
| 8                | 6                | 0              | 0.459679                | 2.117719  | 0.735939  |
| 9                | 6                | 0              | -0.573299               | 1.162682  | 0.281449  |
| 10               | 6                | 0              | -0.395787               | -0.300807 | 0.505301  |
| 11               | 6                | 0              | -1.661242               | 1.674848  | -0.329423 |
| 12               | 6                | 0              | -3.135992               | -0.398200 | -0.464431 |
| 13               | 6                | 0              | -2.930642               | -0.598568 | 1.029033  |
| 14               | 6                | 0              | -1.465116               | -1.049361 | 1.290493  |
| 15               | 6                | 0              | 3.013253                | -3.949445 | -0.250847 |
| 16               | 8                | 0              | 3.927925                | -1.290311 | -1.431652 |
| 17               | 8                | 0              | 1.584423                | 0.387432  | -1.752900 |
| 18               | 6                | 0              | 2.621351                | 3.132264  | 1.327825  |
| 19               | 8                | 0              | 3.566790                | 3.588670  | 0.350279  |
| 20               | 6                | 0              | -2.771541               | 0.955574  | -1.066580 |
| 21               | 6                | 0              | -2.378230               | 0.800227  | -2.552551 |
| 22               | 6                | 0              | -4.075926               | 1.797771  | -0.965733 |
| 23               | 8                | 0              | -3.629137               | -1.298991 | -1.116484 |
| 24               | 8                | 0              | -3.830480               | -1.575553 | 1.519881  |
| 25               | 6                | 0              | -1.177834               | -0.975164 | 2.803071  |
| 26               | 1                | 0              | 0.452919                | -3.044159 | 0.770749  |
| 27               | 1                | 0              | 2.907893                | 0.214804  | 1.362011  |
| 28               | 1                | 0              | 3.530251                | 1.105579  | -0.010078 |
| 29               | 1                | 0              | 0.061935                | 3.100960  | 0.978077  |
| 30               | 1                | 0              | -1.704530               | 2.757284  | -0.429439 |
| 31               | 1                | 0              | -3.128580               | 0.336869  | 1.558607  |
| 32               | 1                | 0              | -1.450532               | -2.099217 | 0.987184  |
| 33               | 1                | 0              | 3.244330                | -4.232111 | -1.282635 |
| 34               | 1                | 0              | 3.968276                | -3.902754 | 0.282086  |
| 35               | 1                | 0              | 2.404029                | -4.735201 | 0.197521  |
| 36               | 1                | 0              | 2.414947                | 0.534971  | -2.226361 |
| 37               | 1                | 0              | 3.229506                | 2.827654  | 2.185343  |
| 38               | 1                | 0              | 1.968034                | 3.950319  | 1.651214  |

|    |   |   |           |           |           |
|----|---|---|-----------|-----------|-----------|
| 39 | 1 | 0 | 3.063296  | 3.865860  | -0.424039 |
| 40 | 1 | 0 | -2.215027 | 1.784176  | -2.997849 |
| 41 | 1 | 0 | -3.173282 | 0.294153  | -3.102624 |
| 42 | 1 | 0 | -1.457196 | 0.223119  | -2.651840 |
| 43 | 1 | 0 | -3.893623 | 2.790852  | -1.383627 |
| 44 | 1 | 0 | -4.403028 | 1.920486  | 0.069500  |
| 45 | 1 | 0 | -4.880520 | 1.325628  | -1.532632 |
| 46 | 1 | 0 | -4.035026 | -2.142198 | 0.759648  |
| 47 | 1 | 0 | -1.145128 | 0.063896  | 3.142336  |
| 48 | 1 | 0 | -1.964281 | -1.495856 | 3.353208  |
| 49 | 1 | 0 | -0.219047 | -1.440850 | 3.040049  |

---

Conformer g-1

---

| Center<br>Number | Atomic<br>Number | Atomic<br>Type | Coordinates (Angstroms) |           |           |
|------------------|------------------|----------------|-------------------------|-----------|-----------|
|                  |                  |                | X                       | Y         | Z         |
| 1                | 6                | 0              | -1.240941               | -2.194196 | 0.470726  |
| 2                | 1                | 0              | -0.544175               | -2.938949 | 0.830959  |
| 3                | 6                | 0              | -2.424416               | -2.507234 | -0.115584 |
| 4                | 6                | 0              | -3.062542               | -1.262307 | -0.559686 |
| 5                | 6                | 0              | -2.207977               | -0.081224 | -0.038174 |
| 6                | 6                | 0              | -0.932708               | -0.768775 | 0.426673  |
| 7                | 6                | 0              | -2.054484               | 1.081813  | -1.009480 |
| 8                | 1                | 0              | -1.408764               | 0.786327  | -1.843719 |
| 9                | 1                | 0              | -3.039419               | 1.302889  | -1.433902 |
| 10               | 6                | 0              | -1.491941               | 2.289911  | -0.295895 |
| 11               | 6                | 0              | -0.291932               | 2.282238  | 0.285971  |
| 12               | 1                | 0              | 0.067073                | 3.202327  | 0.737177  |
| 13               | 6                | 0              | 0.682440                | 1.155503  | 0.255530  |
| 14               | 6                | 0              | 0.294781                | -0.226495 | 0.650920  |
| 15               | 6                | 0              | 1.920997                | 1.493722  | -0.171706 |
| 16               | 1                | 0              | 2.071966                | 2.552191  | -0.374589 |
| 17               | 6                | 0              | 2.781399                | -0.803457 | -0.719620 |
| 18               | 6                | 0              | 2.485788                | -1.626028 | 0.534109  |
| 19               | 1                | 0              | 3.406206                | -1.662550 | 1.131926  |
| 20               | 6                | 0              | 1.343277                | -1.037676 | 1.413311  |
| 21               | 1                | 0              | 0.858040                | -1.934921 | 1.790957  |
| 22               | 6                | 0              | -3.034169               | -3.852033 | -0.332746 |
| 23               | 1                | 0              | -3.231016               | -4.021842 | -1.395842 |
| 24               | 1                | 0              | -3.998765               | -3.926251 | 0.179996  |
| 25               | 1                | 0              | -2.386222               | -4.649586 | 0.033099  |
| 26               | 8                | 0              | -4.118998               | -1.129858 | -1.152495 |
| 27               | 8                | 0              | -2.896552               | 0.352892  | 1.161150  |
| 28               | 1                | 0              | -3.813172               | 0.529379  | 0.909962  |
| 29               | 6                | 0              | -2.390719               | 3.504070  | -0.267103 |
| 30               | 1                | 0              | -3.375545               | 3.197886  | 0.115334  |

---

|    |   |   |           |           |           |
|----|---|---|-----------|-----------|-----------|
| 31 | 1 | 0 | -2.551643 | 3.858828  | -1.291322 |
| 32 | 8 | 0 | -1.886805 | 4.615033  | 0.459325  |
| 33 | 1 | 0 | -1.862632 | 4.369586  | 1.391176  |
| 34 | 6 | 0 | 3.132258  | 0.678741  | -0.604331 |
| 35 | 6 | 0 | 3.547867  | 1.200393  | -1.999421 |
| 36 | 1 | 0 | 2.738260  | 1.087539  | -2.721181 |
| 37 | 1 | 0 | 4.415342  | 0.650943  | -2.370258 |
| 38 | 1 | 0 | 3.811100  | 2.258194  | -1.931835 |
| 39 | 6 | 0 | 4.328394  | 0.882743  | 0.364403  |
| 40 | 1 | 0 | 4.572500  | 1.946314  | 0.412600  |
| 41 | 1 | 0 | 5.208856  | 0.349884  | -0.004700 |
| 42 | 1 | 0 | 4.120125  | 0.541089  | 1.376450  |
| 43 | 8 | 0 | 2.722795  | -1.368393 | -1.795448 |
| 44 | 8 | 0 | 2.137664  | -2.942492 | 0.145161  |
| 45 | 1 | 0 | 2.238365  | -2.961029 | -0.821728 |
| 46 | 6 | 0 | 1.822271  | -0.283606 | 2.669448  |
| 47 | 1 | 0 | 2.299278  | 0.669668  | 2.446521  |
| 48 | 1 | 0 | 2.526765  | -0.904093 | 3.229849  |
| 49 | 1 | 0 | 0.966788  | -0.077900 | 3.317459  |

---

Conformer g-2

---

| Center<br>Number | Atomic<br>Number | Atomic<br>Type | Coordinates (Angstroms) |           |           |
|------------------|------------------|----------------|-------------------------|-----------|-----------|
|                  |                  |                | X                       | Y         | Z         |
| 1                | 6                | 0              | 1.068276                | 2.282904  | 0.308112  |
| 2                | 1                | 0              | 0.316655                | 3.027810  | 0.532546  |
| 3                | 6                | 0              | 2.262318                | 2.579272  | -0.264928 |
| 4                | 6                | 0              | 2.982659                | 1.322662  | -0.508057 |
| 5                | 6                | 0              | 2.161531                | 0.176007  | 0.131254  |
| 6                | 6                | 0              | 0.833936                | 0.849635  | 0.445719  |
| 7                | 6                | 0              | 2.114676                | -1.111910 | -0.679199 |
| 8                | 1                | 0              | 1.496617                | -0.962905 | -1.571420 |
| 9                | 1                | 0              | 3.123204                | -1.344968 | -1.029713 |
| 10               | 6                | 0              | 1.578483                | -2.245130 | 0.167320  |
| 11               | 6                | 0              | 0.347732                | -2.225266 | 0.687178  |
| 12               | 1                | 0              | 0.008651                | -3.088349 | 1.255270  |
| 13               | 6                | 0              | -0.676420               | -1.164181 | 0.472927  |
| 14               | 6                | 0              | -0.373556               | 0.275673  | 0.696184  |
| 15               | 6                | 0              | -1.875793               | -1.620207 | 0.044350  |
| 16               | 1                | 0              | -1.970558               | -2.702573 | -0.019451 |
| 17               | 6                | 0              | -2.819848               | 0.545807  | -0.825384 |
| 18               | 6                | 0              | -2.626107               | 1.528706  | 0.329457  |
| 19               | 1                | 0              | -3.571807               | 1.579763  | 0.885137  |
| 20               | 6                | 0              | -1.491053               | 1.118659  | 1.312559  |
| 21               | 1                | 0              | -1.064714               | 2.080205  | 1.590580  |
| 22               | 6                | 0              | 2.814486                | 3.914232  | -0.639285 |

---

|    |   |   |           |           |           |
|----|---|---|-----------|-----------|-----------|
| 23 | 1 | 0 | 3.055967  | 3.949046  | -1.706176 |
| 24 | 1 | 0 | 3.747328  | 4.111553  | -0.100913 |
| 25 | 1 | 0 | 2.110190  | 4.716410  | -0.415178 |
| 26 | 8 | 0 | 4.071682  | 1.172910  | -1.033330 |
| 27 | 8 | 0 | 2.806236  | -0.053714 | 1.409703  |
| 28 | 1 | 0 | 3.737444  | -0.236773 | 1.225740  |
| 29 | 6 | 0 | 2.509459  | -3.399418 | 0.431670  |
| 30 | 1 | 0 | 2.012754  | -4.152397 | 1.054852  |
| 31 | 1 | 0 | 3.392876  | -3.045118 | 0.971545  |
| 32 | 8 | 0 | 3.020858  | -3.982258 | -0.773883 |
| 33 | 1 | 0 | 2.265182  | -4.303975 | -1.278810 |
| 34 | 6 | 0 | -3.097451 | -0.930910 | -0.546081 |
| 35 | 6 | 0 | -3.406422 | -1.640120 | -1.885462 |
| 36 | 1 | 0 | -2.566059 | -1.565545 | -2.576507 |
| 37 | 1 | 0 | -4.281006 | -1.192924 | -2.361823 |
| 38 | 1 | 0 | -3.614730 | -2.696149 | -1.701038 |
| 39 | 6 | 0 | -4.335063 | -1.084186 | 0.379163  |
| 40 | 1 | 0 | -4.532882 | -2.146157 | 0.540537  |
| 41 | 1 | 0 | -5.216816 | -0.644726 | -0.094807 |
| 42 | 1 | 0 | -4.199895 | -0.617183 | 1.353024  |
| 43 | 8 | 0 | -2.744539 | 0.981179  | -1.958663 |
| 44 | 8 | 0 | -2.337470 | 2.808446  | -0.203710 |
| 45 | 1 | 0 | -2.396240 | 2.705990  | -1.168806 |
| 46 | 6 | 0 | -1.986009 | 0.501359  | 2.635427  |
| 47 | 1 | 0 | -2.416509 | -0.491445 | 2.513869  |
| 48 | 1 | 0 | -2.735904 | 1.153356  | 3.090990  |
| 49 | 1 | 0 | -1.148890 | 0.413028  | 3.332070  |

Conformer h-1

| Center<br>Number | Atomic<br>Number | Atomic<br>Type | Coordinates (Angstroms) |           |           |
|------------------|------------------|----------------|-------------------------|-----------|-----------|
|                  |                  |                | X                       | Y         | Z         |
| 1                | 6                | 0              | 1.335800                | -2.258582 | -0.415766 |
| 2                | 1                | 0              | 0.668274                | -3.019320 | -0.798823 |
| 3                | 6                | 0              | 2.523529                | -2.554890 | 0.168118  |
| 4                | 6                | 0              | 3.147068                | -1.297690 | 0.604297  |
| 5                | 6                | 0              | 2.288243                | -0.133746 | 0.052662  |
| 6                | 6                | 0              | 1.006514                | -0.835717 | -0.375027 |
| 7                | 6                | 0              | 2.150817                | 1.066597  | 0.978713  |
| 8                | 1                | 0              | 1.514075                | 0.807931  | 1.831656  |
| 9                | 1                | 0              | 3.141324                | 1.301769  | 1.381901  |
| 10               | 6                | 0              | 1.582702                | 2.242302  | 0.217986  |
| 11               | 6                | 0              | 0.371808                | 2.209934  | -0.339186 |
| 12               | 1                | 0              | 0.009196                | 3.105933  | -0.833839 |
| 13               | 6                | 0              | -0.609078               | 1.092235  | -0.230509 |
| 14               | 6                | 0              | -0.231733               | -0.307011 | -0.573678 |

|    |   |   |           |           |           |
|----|---|---|-----------|-----------|-----------|
| 15 | 6 | 0 | -1.835999 | 1.472839  | 0.197005  |
| 16 | 1 | 0 | -1.956628 | 2.545084  | 0.340925  |
| 17 | 6 | 0 | -2.772558 | -0.766351 | 0.908017  |
| 18 | 6 | 0 | -2.362138 | -1.692521 | -0.255427 |
| 19 | 1 | 0 | -1.916944 | -2.546959 | 0.256906  |
| 20 | 6 | 0 | -1.306379 | -1.158271 | -1.256286 |
| 21 | 1 | 0 | -0.823675 | -2.058989 | -1.633133 |
| 22 | 6 | 0 | 3.153967  | -3.889645 | 0.385034  |
| 23 | 1 | 0 | 3.358687  | -4.052132 | 1.447729  |
| 24 | 1 | 0 | 4.116962  | -3.950610 | -0.132303 |
| 25 | 1 | 0 | 2.515918  | -4.697941 | 0.025597  |
| 26 | 8 | 0 | 4.195458  | -1.150164 | 1.205859  |
| 27 | 8 | 0 | 2.964242  | 0.249877  | -1.171576 |
| 28 | 1 | 0 | 3.881889  | 0.444485  | -0.938497 |
| 29 | 6 | 0 | 2.489131  | 3.445454  | 0.101142  |
| 30 | 1 | 0 | 3.466409  | 3.107934  | -0.274089 |
| 31 | 1 | 0 | 2.666475  | 3.864332  | 1.098051  |
| 32 | 8 | 0 | 1.982541  | 4.510955  | -0.688620 |
| 33 | 1 | 0 | 1.933253  | 4.201513  | -1.600254 |
| 34 | 6 | 0 | -3.066031 | 0.723840  | 0.686298  |
| 35 | 6 | 0 | -3.464536 | 1.356134  | 2.039674  |
| 36 | 1 | 0 | -2.661791 | 1.260712  | 2.772080  |
| 37 | 1 | 0 | -4.352500 | 0.867105  | 2.443492  |
| 38 | 1 | 0 | -3.685112 | 2.416761  | 1.899862  |
| 39 | 6 | 0 | -4.261080 | 0.911545  | -0.288780 |
| 40 | 1 | 0 | -4.483585 | 1.977121  | -0.382009 |
| 41 | 1 | 0 | -5.152100 | 0.412983  | 0.100681  |
| 42 | 1 | 0 | -4.061342 | 0.539103  | -1.292424 |
| 43 | 8 | 0 | -2.879030 | -1.266963 | 2.008368  |
| 44 | 8 | 0 | -3.532642 | -2.228076 | -0.878248 |
| 45 | 1 | 0 | -3.953289 | -1.545453 | -1.411629 |
| 46 | 6 | 0 | -1.840667 | -0.461640 | -2.524516 |
| 47 | 1 | 0 | -2.293672 | 0.509907  | -2.335693 |
| 48 | 1 | 0 | -2.563771 | -1.101253 | -3.036060 |
| 49 | 1 | 0 | -1.008895 | -0.303940 | -3.214999 |

Conformer h-2

| Center<br>Number | Atomic<br>Number | Atomic<br>Type | Coordinates (Angstroms) |          |           |
|------------------|------------------|----------------|-------------------------|----------|-----------|
|                  |                  |                | X                       | Y        | Z         |
| 1                | 6                | 0              | -1.233997               | 2.245313 | -0.345811 |
| 2                | 1                | 0              | -0.566689               | 3.015663 | -0.709480 |
| 3                | 6                | 0              | -2.424388               | 2.521425 | 0.240423  |
| 4                | 6                | 0              | -3.039379               | 1.251455 | 0.664133  |
| 5                | 6                | 0              | -2.184133               | 0.105622 | 0.068949  |
| 6                | 6                | 0              | -0.905391               | 0.820310 | -0.344588 |

|    |   |   |           |           |           |
|----|---|---|-----------|-----------|-----------|
| 7  | 6 | 0 | -2.036011 | -1.126969 | 0.950691  |
| 8  | 1 | 0 | -1.339625 | -0.920264 | 1.769459  |
| 9  | 1 | 0 | -3.011758 | -1.353346 | 1.383433  |
| 10 | 6 | 0 | -1.550549 | -2.272067 | 0.089166  |
| 11 | 6 | 0 | -0.361350 | -2.222907 | -0.518213 |
| 12 | 1 | 0 | -0.054818 | -3.054190 | -1.148612 |
| 13 | 6 | 0 | 0.660240  | -1.150297 | -0.320698 |
| 14 | 6 | 0 | 0.321485  | 0.277622  | -0.577927 |
| 15 | 6 | 0 | 1.870386  | -1.596606 | 0.084957  |
| 16 | 1 | 0 | 1.960302  | -2.679150 | 0.156462  |
| 17 | 6 | 0 | 2.865710  | 0.569809  | 0.932873  |
| 18 | 6 | 0 | 2.481942  | 1.578316  | -0.171346 |
| 19 | 1 | 0 | 2.056518  | 2.409018  | 0.393823  |
| 20 | 6 | 0 | 1.417305  | 1.138751  | -1.208846 |
| 21 | 1 | 0 | 0.960195  | 2.074770  | -1.527433 |
| 22 | 6 | 0 | -3.059918 | 3.847093  | 0.491534  |
| 23 | 1 | 0 | -3.282543 | 3.971188  | 1.555665  |
| 24 | 1 | 0 | -4.014573 | 3.923916  | -0.039037 |
| 25 | 1 | 0 | -2.417760 | 4.667876  | 0.169957  |
| 26 | 8 | 0 | -4.050283 | 1.094908  | 1.317695  |
| 27 | 8 | 0 | -2.951400 | -0.245723 | -1.126242 |
| 28 | 1 | 0 | -2.320268 | -0.414941 | -1.836274 |
| 29 | 6 | 0 | -2.511429 | -3.412682 | -0.136295 |
| 30 | 1 | 0 | -2.614457 | -4.004543 | 0.780878  |
| 31 | 1 | 0 | -2.120978 | -4.075041 | -0.918657 |
| 32 | 8 | 0 | -3.827967 | -2.955180 | -0.463713 |
| 33 | 1 | 0 | -3.730873 | -2.101900 | -0.914825 |
| 34 | 6 | 0 | 3.117286  | -0.913496 | 0.623726  |
| 35 | 6 | 0 | 3.490275  | -1.636692 | 1.938502  |
| 36 | 1 | 0 | 2.687691  | -1.561189 | 2.673423  |
| 37 | 1 | 0 | 4.390330  | -1.198768 | 2.372777  |
| 38 | 1 | 0 | 3.680590  | -2.693142 | 1.736327  |
| 39 | 6 | 0 | 4.311976  | -1.077849 | -0.356636 |
| 40 | 1 | 0 | 4.508371  | -2.141986 | -0.506984 |
| 41 | 1 | 0 | 5.212846  | -0.624681 | 0.064255  |
| 42 | 1 | 0 | 4.128458  | -0.646331 | -1.339728 |
| 43 | 8 | 0 | 2.988901  | 1.000412  | 2.060388  |
| 44 | 8 | 0 | 3.667867  | 2.121082  | -0.755937 |
| 45 | 1 | 0 | 4.076254  | 1.460005  | -1.324753 |
| 46 | 6 | 0 | 1.941597  | 0.508873  | -2.515248 |
| 47 | 1 | 0 | 2.365346  | -0.485006 | -2.384202 |
| 48 | 1 | 0 | 2.687847  | 1.158075  | -2.978868 |
| 49 | 1 | 0 | 1.112698  | 0.419799  | -3.221225 |

---



## Results: The crotonol A induced K562 cells apoptosis

Figure S2. Trials for the crotonol A induced K562 cells apoptosis

(n=3) A

B

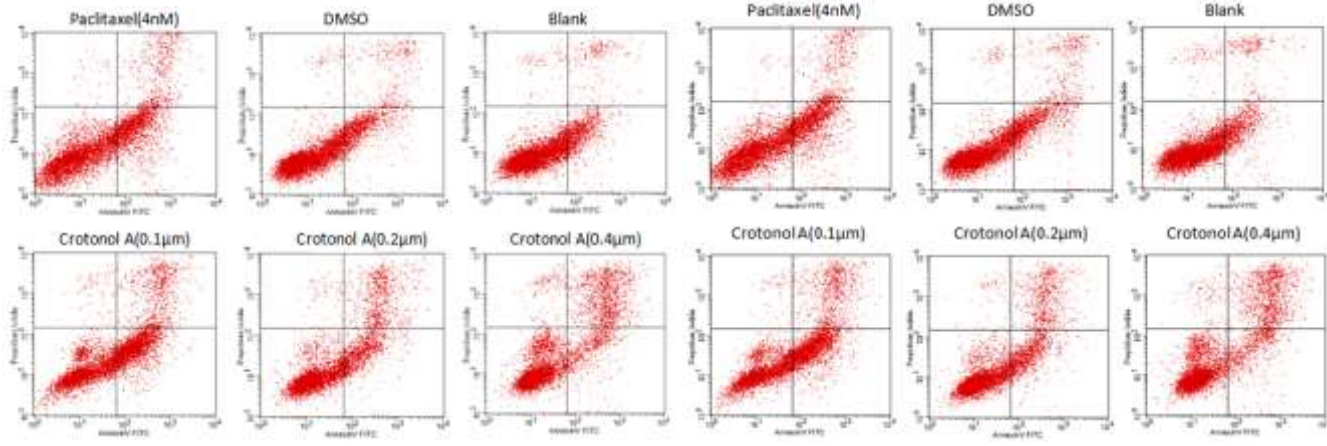

C

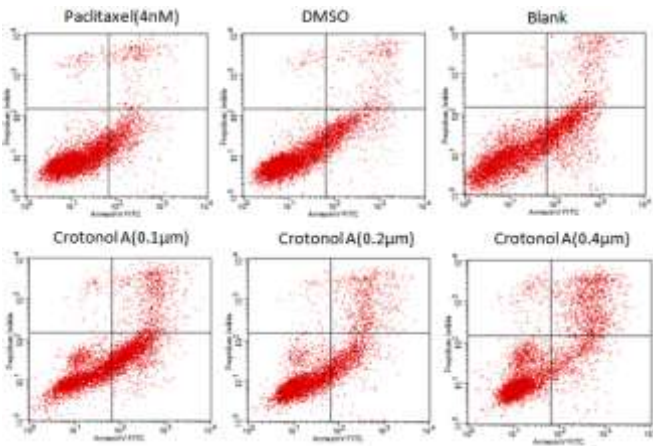

**Table S4.** Flow cytometry analyses of K562 cell apoptosis

| Group                   | Upper left(UL) | Upper Right(UR) | Lower Left(LL) | Lower Right(LR) | Apoptosis rate (UR+LR) |
|-------------------------|----------------|-----------------|----------------|-----------------|------------------------|
| Paclitaxel (4nM)        | 0.55           | 7.01            | 65.48          | 26.96           | 33.97                  |
|                         | 0.58           | 6.78            | 65.95          | 26.69           | 33.47                  |
|                         | 0.52           | 6.91            | 66.05          | 26.52           | 33.43                  |
| DMSO                    | 0.74           | 4.08            | 77.27          | 17.91           | 21.99                  |
|                         | 0.72           | 4.85            | 76.43          | 18.00           | 22.85                  |
|                         | 0.83           | 4.32            | 77.92          | 16.93           | 21.25                  |
| Blank                   | 1.21           | 3.20            | 82.74          | 12.85           | 16.05                  |
|                         | 1.18           | 3.55            | 81.83          | 13.44           | 16.99                  |
|                         | 1.06           | 3.01            | 82.81          | 13.12           | 16.13                  |
| Crotonol A(0.1 $\mu$ M) | 1.07           | 10.34           | 53.06          | 35.53           | 45.87                  |
|                         | 0.80           | 11.12           | 52.47          | 35.61           | 46.73                  |
|                         | 0.90           | 10.82           | 52.72          | 35.56           | 46.38                  |
| Crotonol A(0.2 $\mu$ M) | 0.77           | 9.80            | 73.73          | 15.70           | 25.50                  |
|                         | 0.81           | 9.33            | 73.86          | 16.00           | 24.33                  |
|                         | 0.82           | 8.87            | 74.91          | 15.40           | 24.27                  |
| Crotonol A(0.4 $\mu$ M) | 1.59           | 16.43           | 72.49          | 9.49            | 25.92                  |
|                         | 1.94           | 15.77           | 72.45          | 9.84            | 25.61                  |
|                         | 1.89           | 16.04           | 72.95          | 9.12            | 25.16                  |

**Figure S3.** Trials for Up-regulation levels of cleaved-PARP and bax as well as down-regulation level of bcl-2 in K562 cells treated with crotonol A.

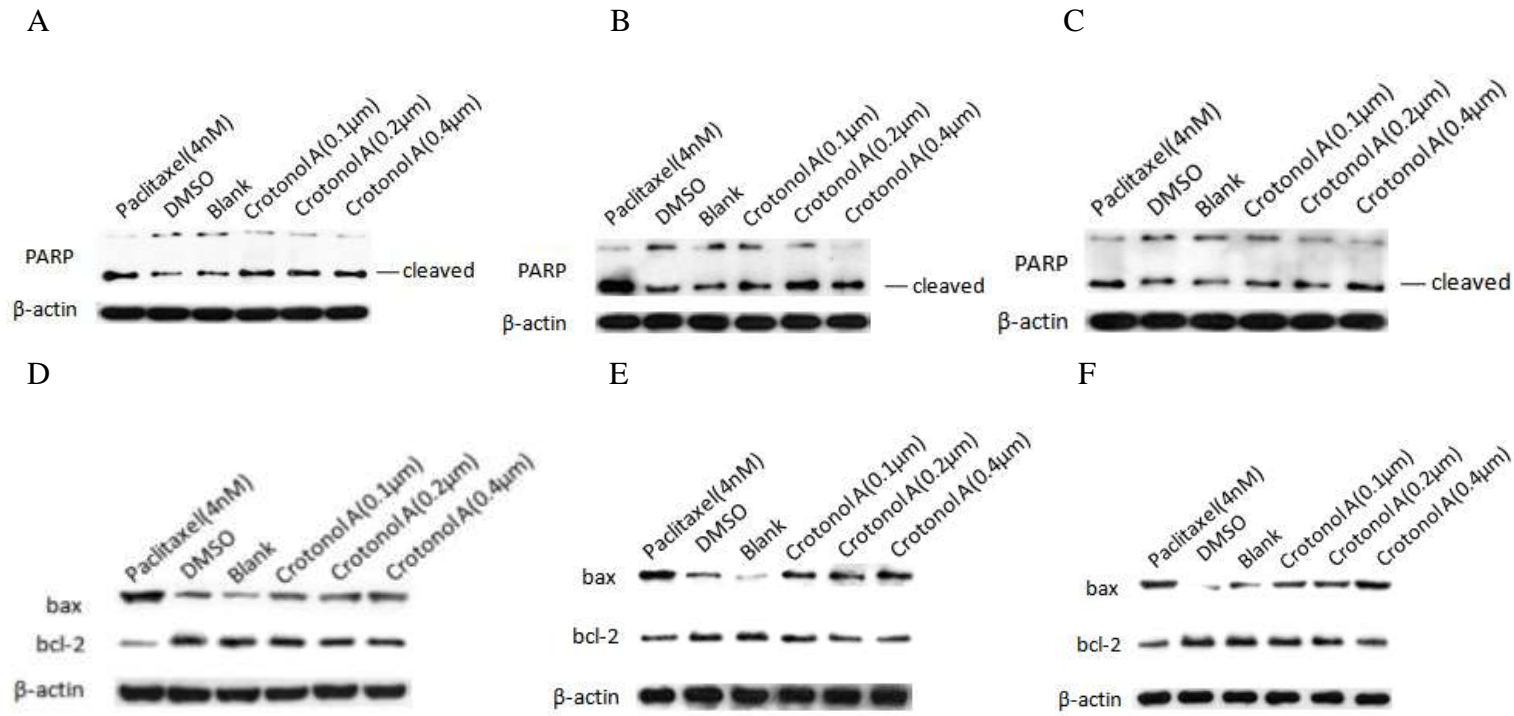

**Table S5.** The data of grey analyses using quantity one analysis software

| Group                                | Paclitaxel<br>(4nM) | DMSO   | Blank  | Crotonol A<br>(0.1 $\mu$ M) | Crotonol A<br>(0.2 $\mu$ M) | Crotonol A<br>(0.4 $\mu$ M) |
|--------------------------------------|---------------------|--------|--------|-----------------------------|-----------------------------|-----------------------------|
| PARP                                 | 15.10               | 35.66  | 32.23  | 24.60                       | 20.51                       | 11.34                       |
|                                      | 10.49               | 28.53  | 29.06  | 20.20                       | 15.18                       | 11.22                       |
|                                      | 16.76               | 30.35  | 31.43  | 22.25                       | 18.09                       | 13.96                       |
| PARP<br>-cleaved                     | 71.72               | 42.92  | 39.36  | 50.79                       | 58.65                       | 53.02                       |
|                                      | 58.78               | 32.28  | 34.89  | 45.99                       | 48.59                       | 50.99                       |
|                                      | 50.16               | 33.83  | 31.94  | 37.84                       | 41.56                       | 47.47                       |
| $\beta$ -actin                       | 134.52              | 133.49 | 132.57 | 131.89                      | 133.41                      | 133.02                      |
|                                      | 139.70              | 136.87 | 137.43 | 139.56                      | 136.74                      | 137.51                      |
|                                      | 133.26              | 132.42 | 132.17 | 133.05                      | 131.68                      | 132.88                      |
| PARP/ $\beta$ -actin                 | 0.11                | 0.27   | 0.24   | 0.19                        | 0.15                        | 0.09                        |
|                                      | 0.08                | 0.21   | 0.21   | 0.14                        | 0.11                        | 0.08                        |
|                                      | 0.13                | 0.23   | 0.24   | 0.17                        | 0.14                        | 0.11                        |
| PARP<br>-cleaved<br>/ $\beta$ -actin | 0.53                | 0.32   | 0.30   | 0.39                        | 0.44                        | 0.40                        |
|                                      | 0.42                | 0.24   | 0.25   | 0.33                        | 0.36                        | 0.37                        |
|                                      | 0.38                | 0.26   | 0.24   | 0.28                        | 0.32                        | 0.36                        |
| bax                                  | 77.66               | 24.39  | 17.36  | 45.48                       | 52.66                       | 65.70                       |
|                                      | 71.57               | 13.46  | 27.27  | 42.57                       | 53.69                       | 72.29                       |
|                                      | 79.62               | 29.06  | 16.34  | 43.85                       | 52.74                       | 60.87                       |
| $\beta$ -actin                       | 133.66              | 134.01 | 132.23 | 134.48                      | 132.83                      | 130.24                      |
|                                      | 128.41              | 130.92 | 127.18 | 131.40                      | 129.08                      | 130.88                      |
|                                      | 132.48              | 134.34 | 129.44 | 129.00                      | 131.17                      | 128.43                      |
| bax/ $\beta$ -actin                  | 0.58                | 0.18   | 0.13   | 0.34                        | 0.40                        | 0.50                        |
|                                      | 0.56                | 0.10   | 0.21   | 0.32                        | 0.42                        | 0.55                        |

|                       |        |        |        |        |        |        |
|-----------------------|--------|--------|--------|--------|--------|--------|
|                       | 0.60   | 0.22   | 0.13   | 0.34   | 0.40   | 0.47   |
| bcl-2                 | 36.37  | 52.25  | 57.94  | 47.33  | 37.81  | 35.48  |
|                       | 26.10  | 56.75  | 59.67  | 48.63  | 42.47  | 30.68  |
|                       | 20.77  | 52.35  | 51.67  | 48.30  | 40.80  | 37.43  |
| $\beta$ -actin        | 133.66 | 134.01 | 132.23 | 134.48 | 132.83 | 130.24 |
|                       | 128.41 | 130.92 | 127.18 | 131.40 | 129.08 | 130.88 |
|                       | 132.48 | 134.34 | 129.44 | 129.00 | 131.17 | 128.43 |
| bcl-2/ $\beta$ -actin | 0.27   | 0.38   | 0.44   | 0.35   | 0.28   | 0.27   |
|                       | 0.20   | 0.43   | 0.46   | 0.37   | 0.33   | 0.23   |
|                       | 0.16   | 0.39   | 0.40   | 0.37   | 0.31   | 0.29   |
| bcl-2/bax             | 0.47   | 3.88   | 3.34   | 1.04   | 0.72   | 0.54   |
|                       | 0.36   | 1.95   | 2.16   | 1.14   | 0.79   | 0.42   |
|                       | 0.26   | 2.14   | 3.16   | 1.10   | 0.77   | 0.61   |

**Figure S4.** The  $^1\text{H}$  NMR spectrum of crotonol A (**1**) in  $\text{CD}_3\text{OD}$

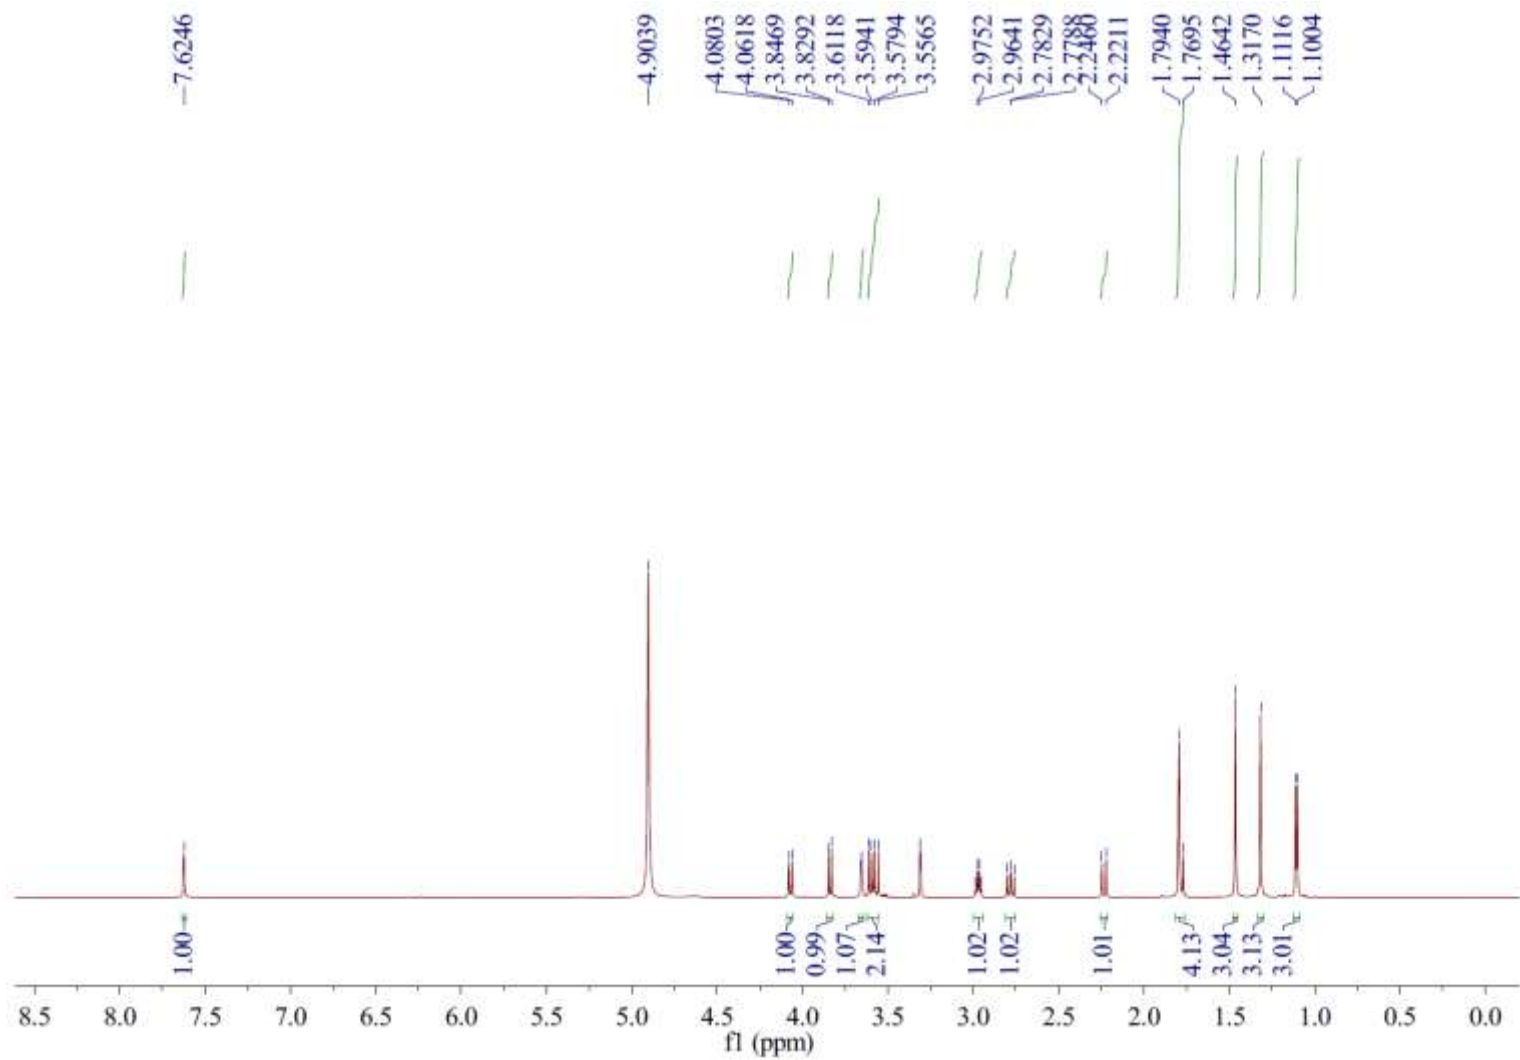

**Figure S5.** The  $^{13}\text{C}$  NMR spectrum of crotonol A (**1**) in  $\text{CD}_3\text{OD}$

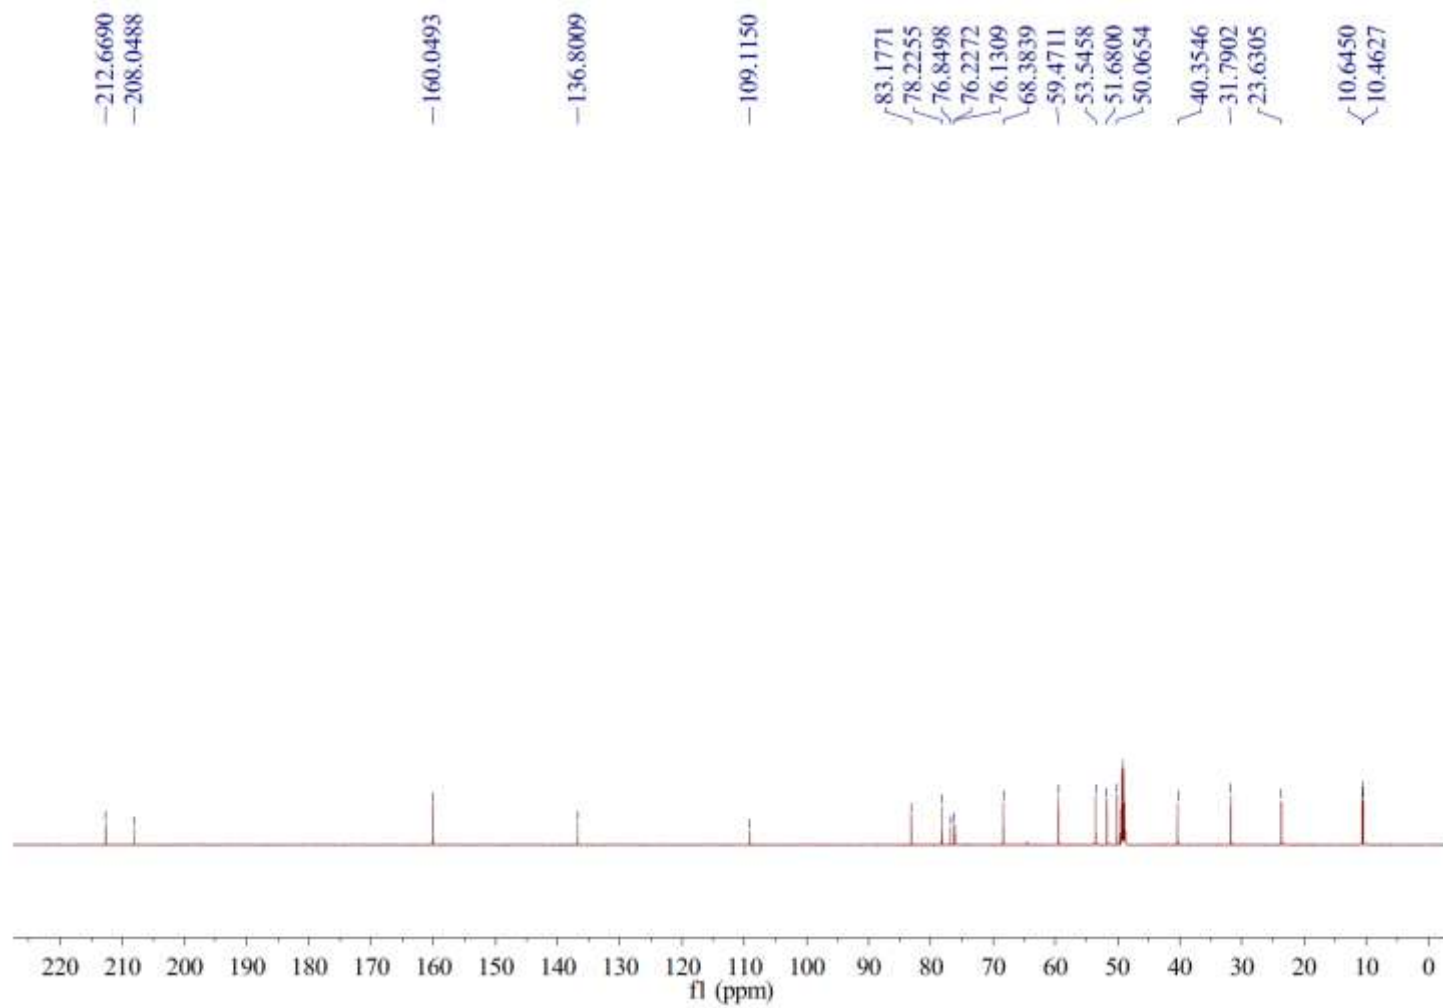

**Figure S6.** The HSQC spectrum of crotonol A (**1**) in CD<sub>3</sub>OD

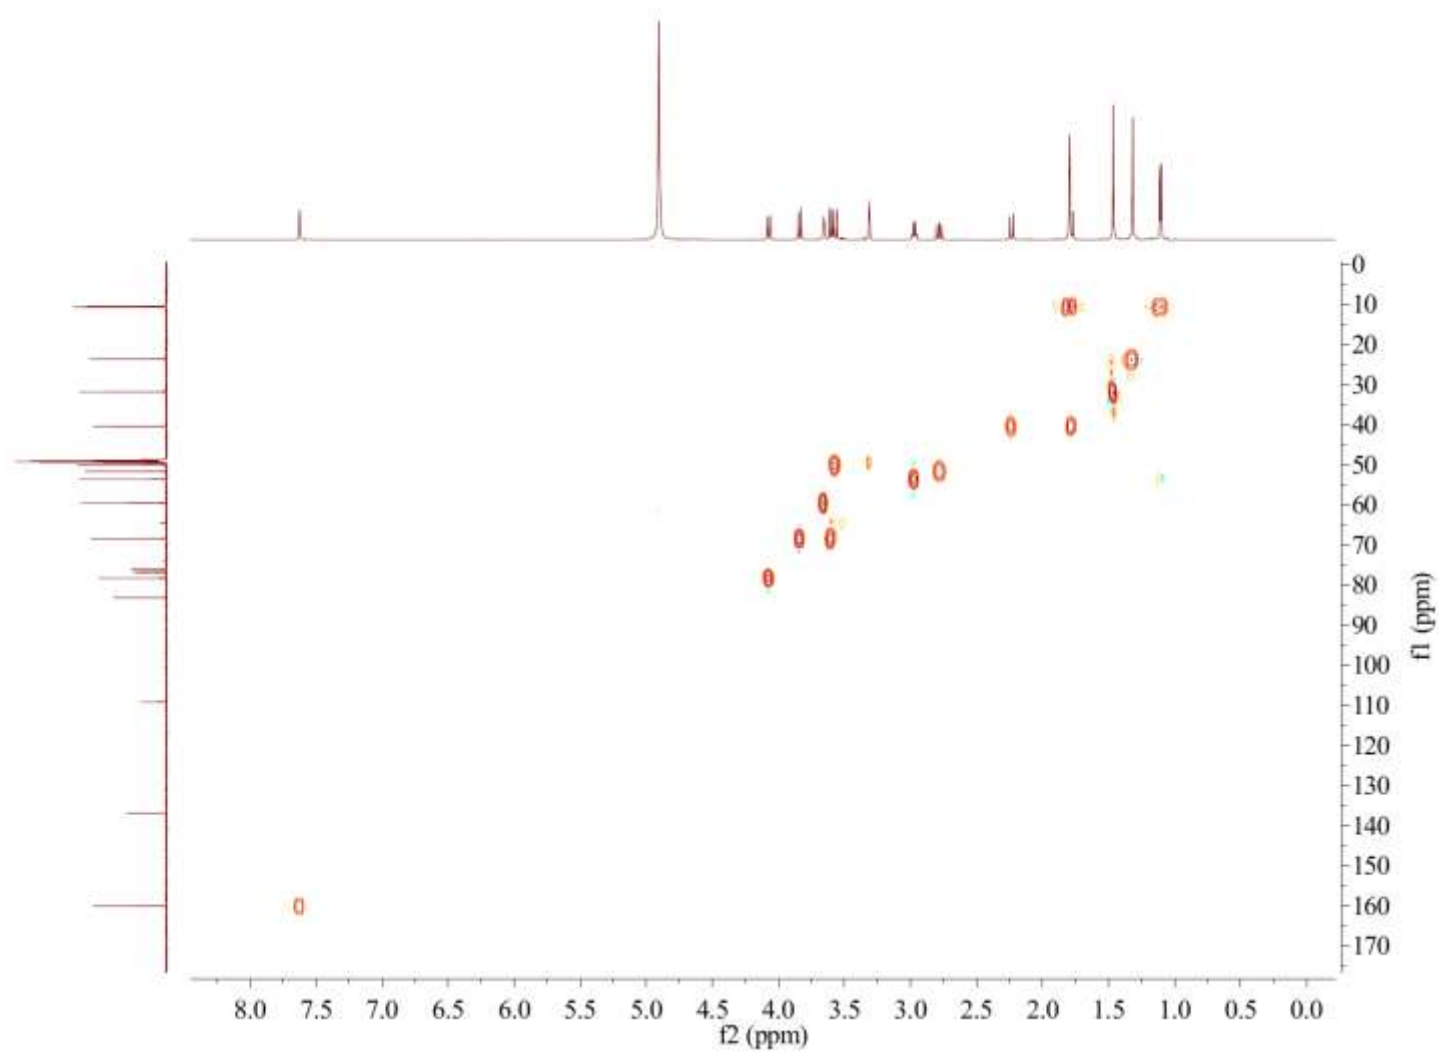



**Figure S7.** The  $^1\text{H}$ - $^1\text{H}$  COSY spectrum of crotonol A (**1**) in  $\text{CD}_3\text{OD}$

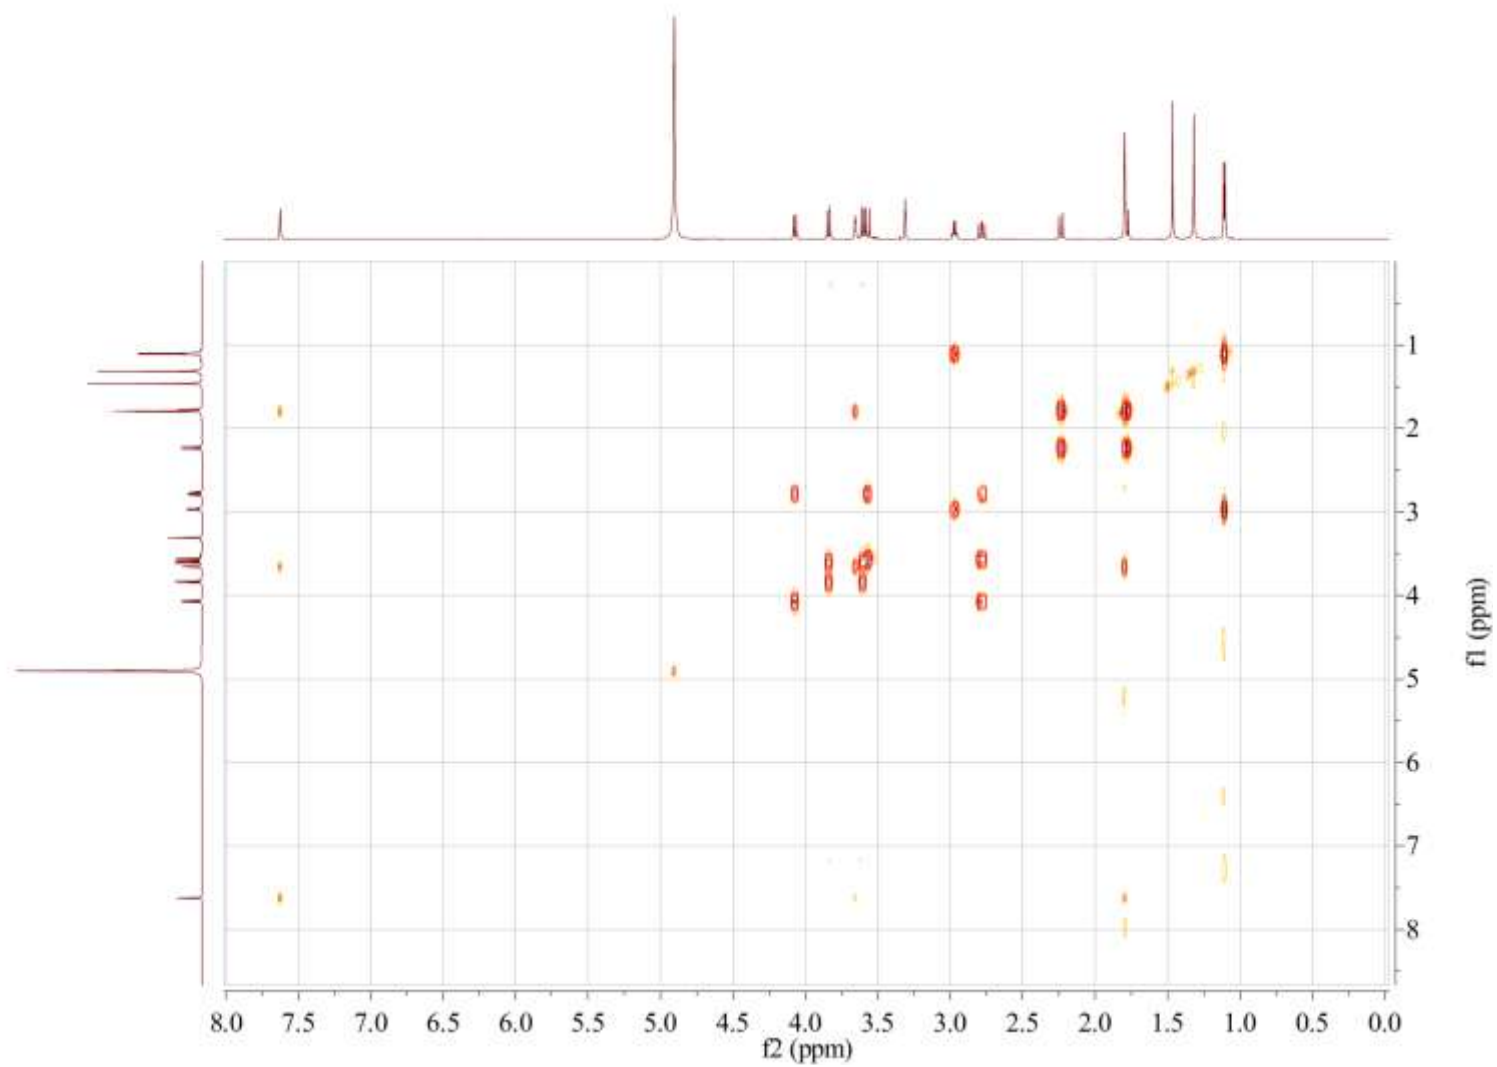

**Figure S8.** The HMBC spectrum of crotonol A (**1**) in CD<sub>3</sub>OD

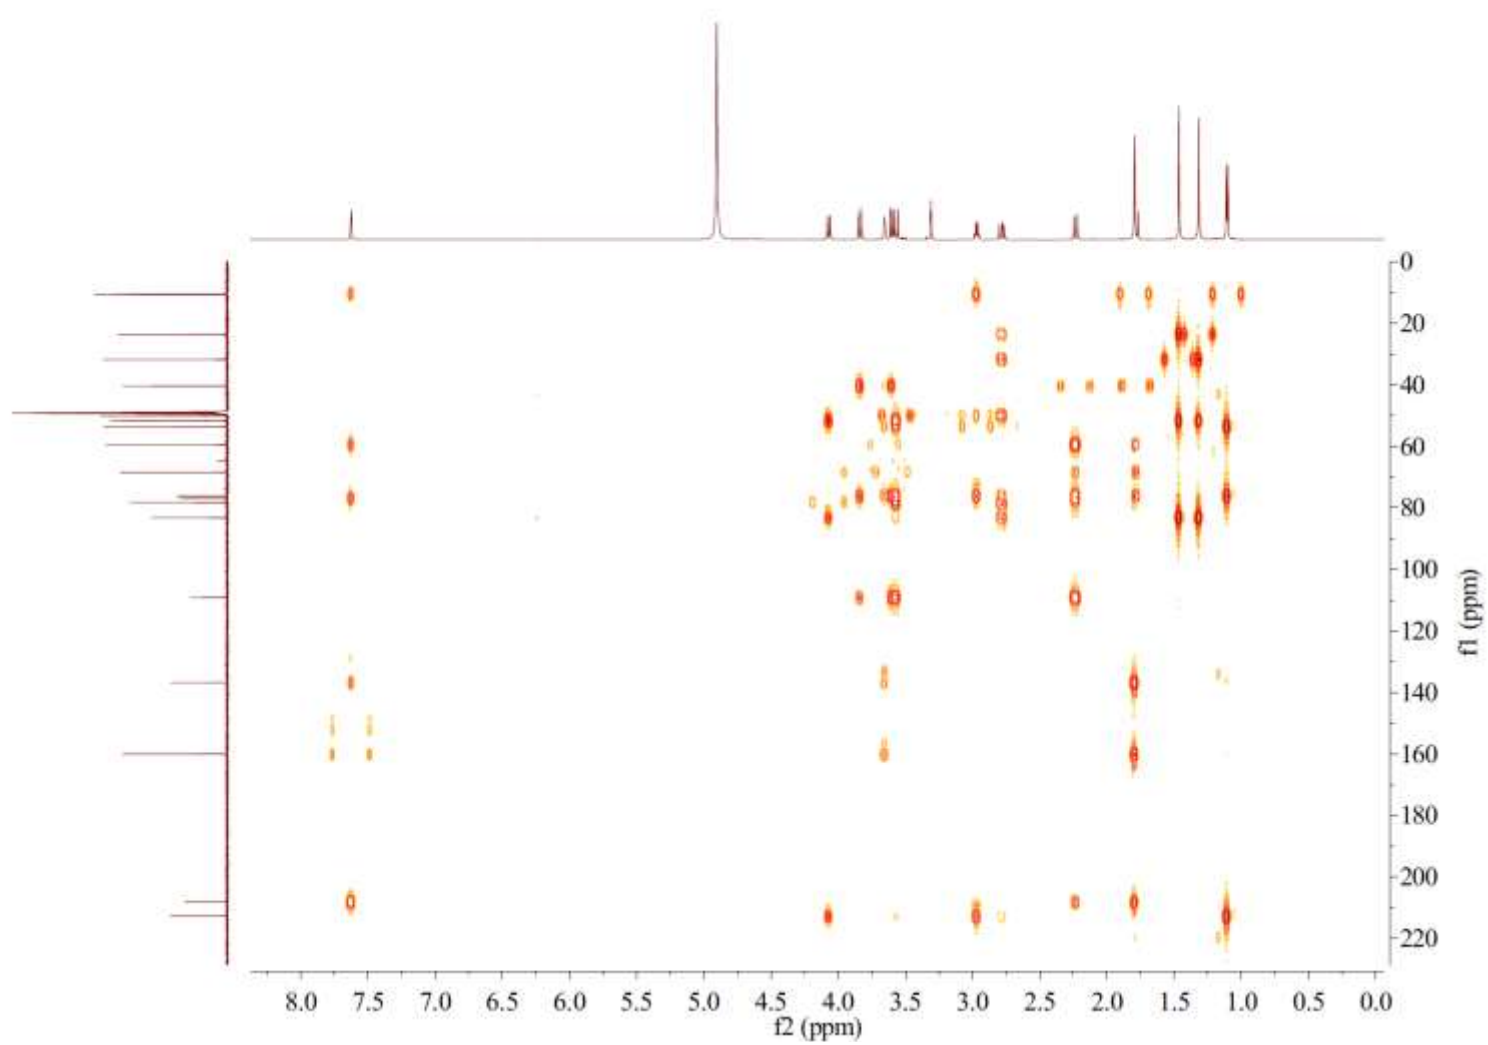

Figure S9. The enlarged HMBC spectrum of crotonol A (1) about correlation H-14/C-7 and H-5/C-4

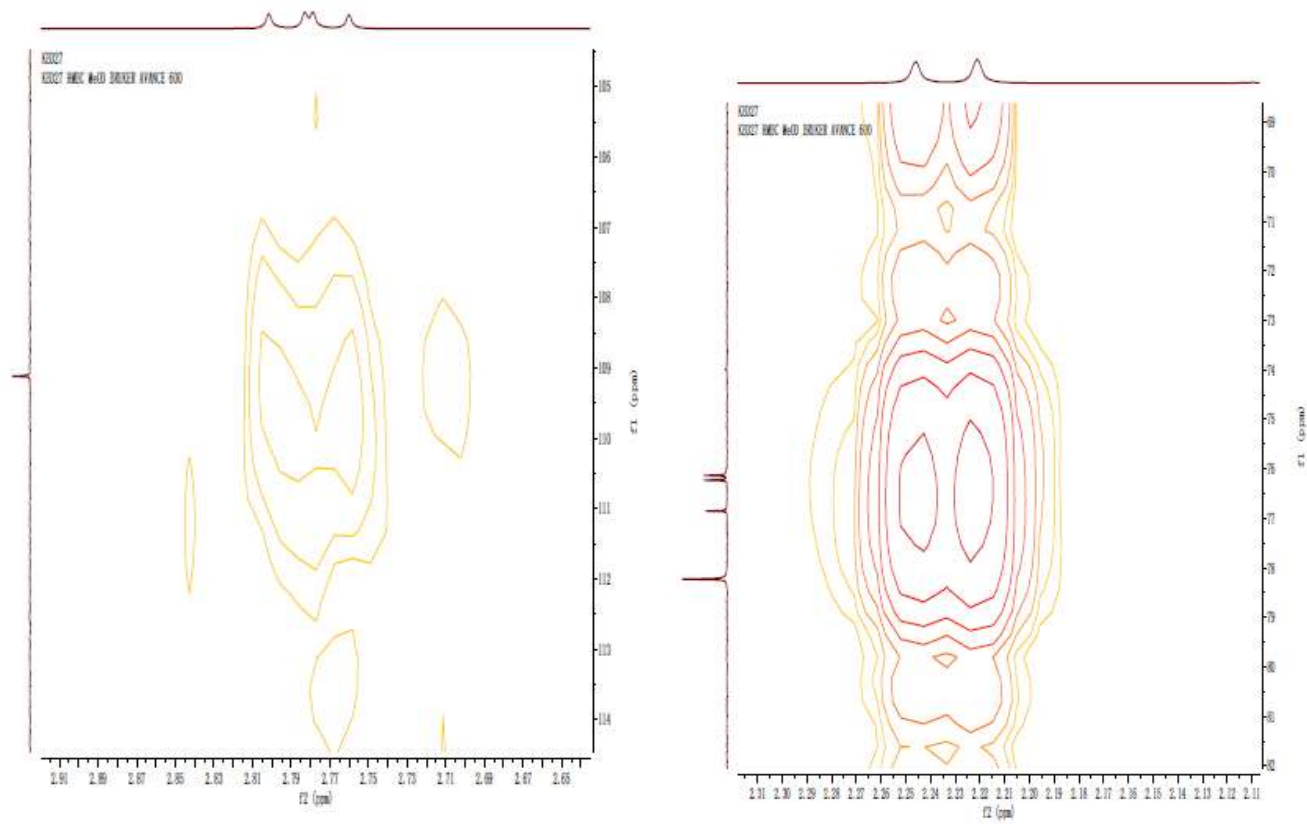

Figure S10. The enlarged HMBC spectrum of crotonol A (1) about the H-10/H-19b/H-8 signals and the C-13/C-4/C-9/C-6 signals

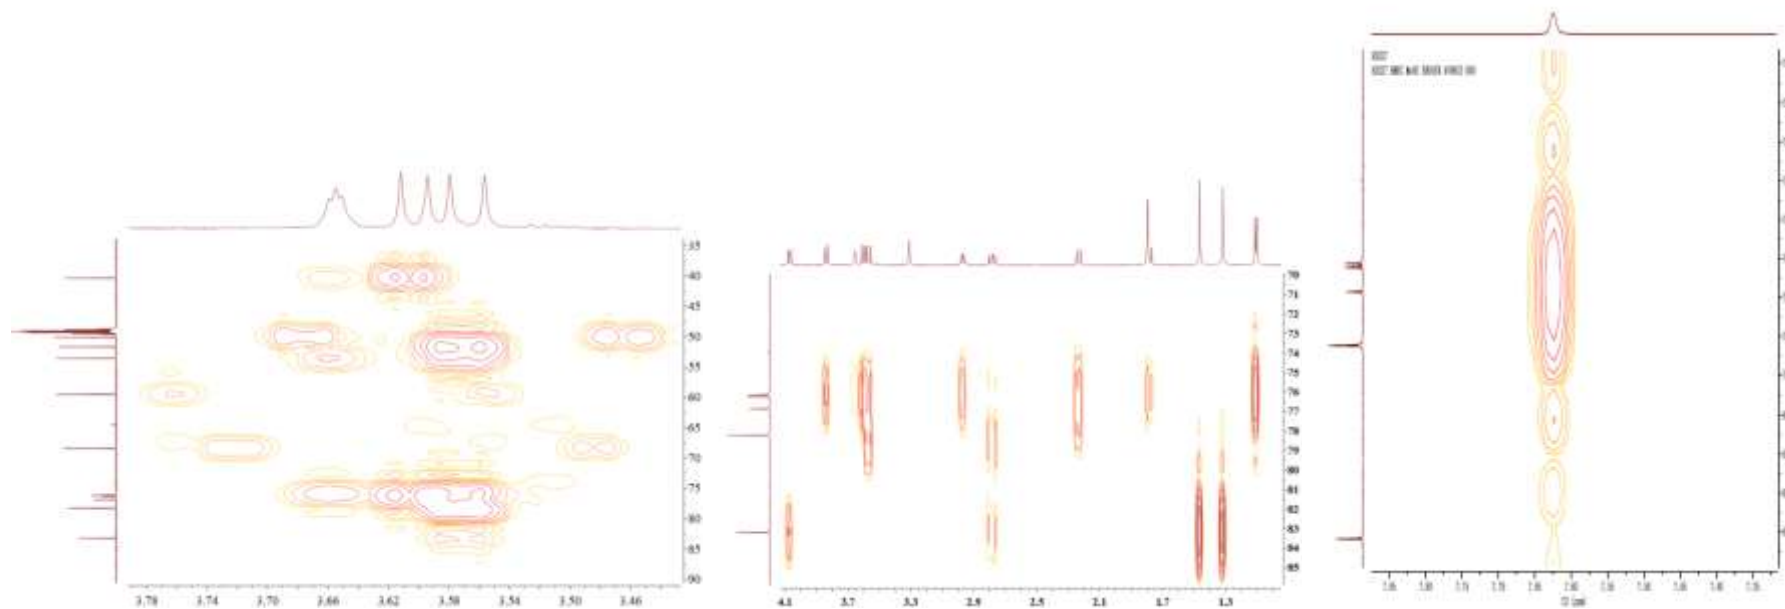

**Figure S11.** The NOESY spectrum of crotonol A (**1**) in CD<sub>3</sub>OD

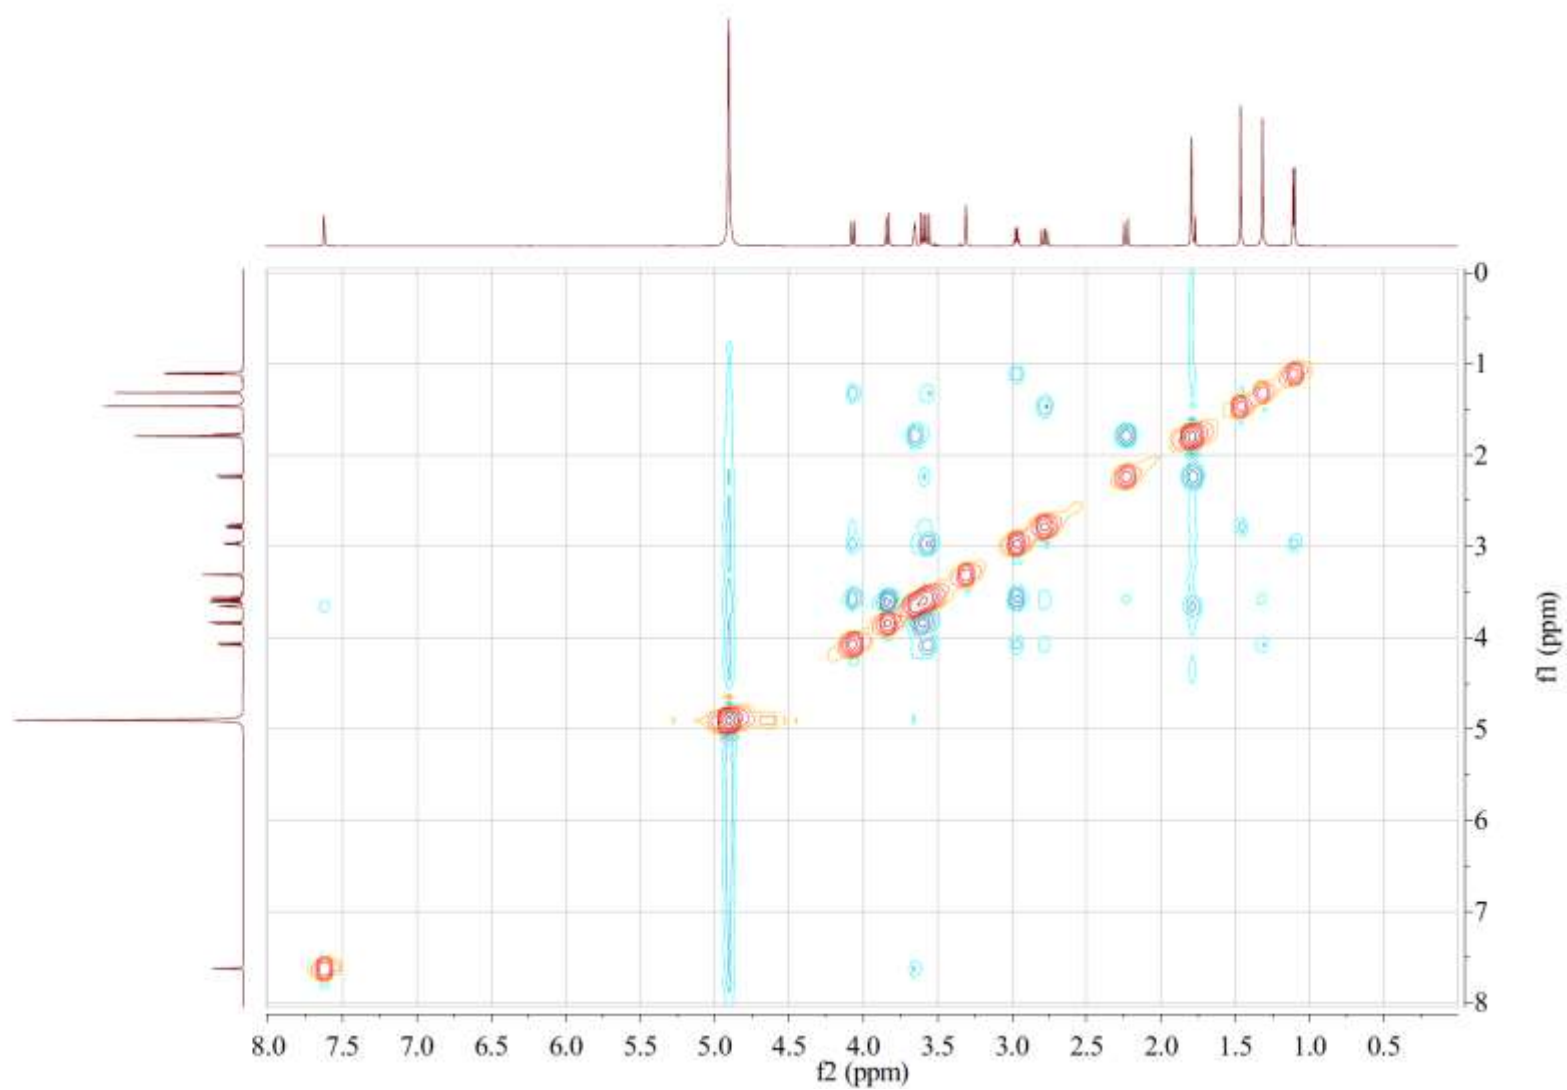

Figure S12. The enlarged NOESY spectrum of crotonol A (1) about H-10/H-19b/H-8 signals

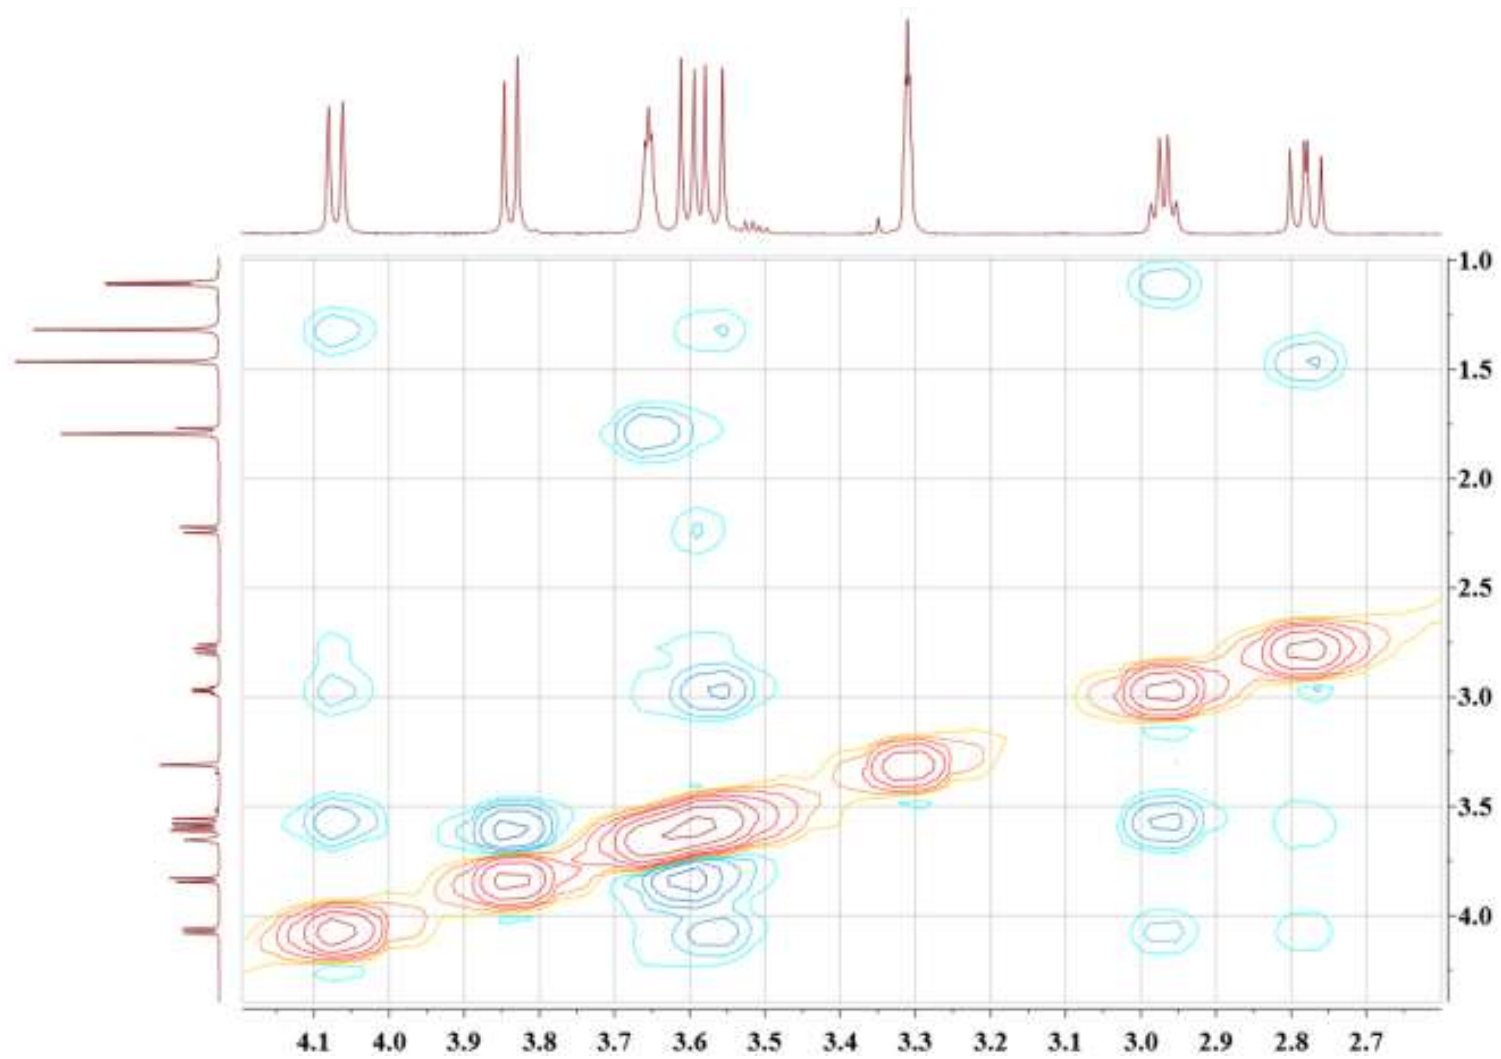

Figure S13. The HRESIMS spectrum of crotonol A (1)

### Qualitative Analysis Report

Data Filename: KBD-27.d  
 Sample Type: Sample  
 Instrument Name: SIBU-ESI-Im  
 Instrument 1: SIBU-ESI-Im  
 Acc Method: Success  
 IRM Calibration Status: Success  
 Comment: Success

Sample Name: KBD-27  
 Position: P1-A2  
 User Name: SIBU-ESI-Im  
 Acquired Time: 12/25/2015 4:12:24 PM  
 DA Method: ESI(+.m)

Sample Group: 6200 series TOF/6500 series  
 Acquisition SW: Q-TOF B.05.01 (B5125.2)  
 Version: Q-TOF B.05.01 (B5125.2)

#### User Spectra

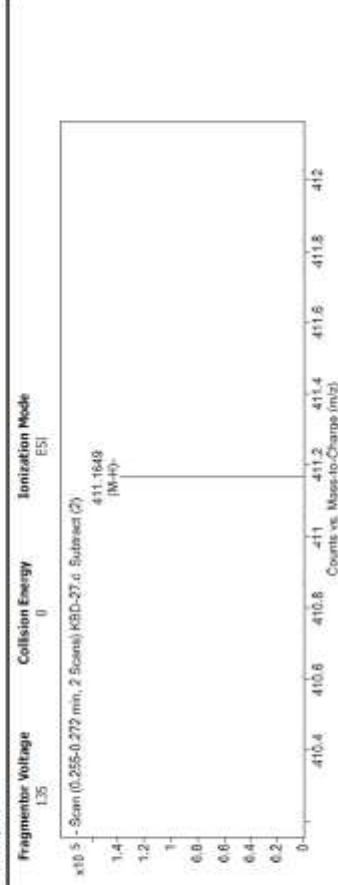

#### Peak List

| m/z      | z | Abund     | Formula    | Ion                |
|----------|---|-----------|------------|--------------------|
| 411.1649 | 1 | 138945.25 | C20 H28 O9 | (M-H) <sup>-</sup> |
| 412.1685 | 1 | 35033.69  | C20 H28 O9 | (M-H) <sup>-</sup> |
| 447.1412 | 1 | 15735.56  |            |                    |
| 474.1602 | 1 | 4891.79   |            |                    |
| 509.1412 | 1 | 12887.99  |            |                    |
| 525.1574 | 1 | 184300.78 |            |                    |
| 526.161  | 1 | 48794.4   |            |                    |
| 823.3359 | 1 | 17181.43  |            |                    |

#### Formula Calculator Element Limits

| Element | Min | Max |
|---------|-----|-----|
| C       | 3   | 60  |
| H       | 0   | 120 |
| O       | 0   | 30  |

| Formula    | CalculatedMass | CalculatedMz | Mz       | Diff. (mDa) | Diff. (ppm) | DBE    |
|------------|----------------|--------------|----------|-------------|-------------|--------|
| C20 H28 O9 | 412.1733       | 411.1661     | 411.1649 | -1.1        | 2.5         | 7.0000 |

--- End Of Report ---

Figure S14. The UV spectrum of crotonol A (1) in MeOH

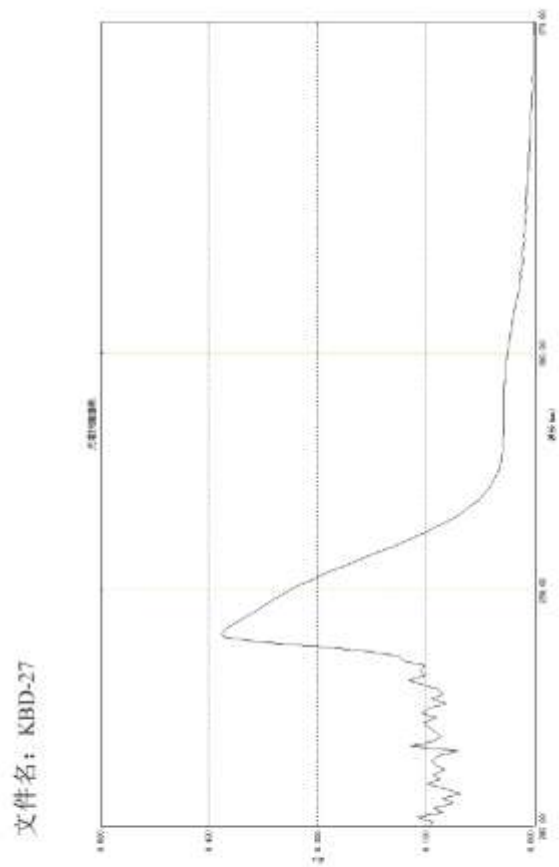

创建时间: 2017年6月14日 9:00:00

数据: 原始数据

测量模式: Abs  
扫描速度: 中速  
光谱带宽: 2.0nm  
采样间隔: 1.0nm

| 序号 | 峰/谷 | 波长(nm) | Abs   |
|----|-----|--------|-------|
| 1  | 峰   | 241.00 | 0.433 |

样品浓度: 0.0227mg/mL  
溶剂: 甲醇



**Figure S15.** The  $^1\text{H}$  NMR spectrum of crotonol B (**2**) in  $\text{CD}_3\text{OD}$

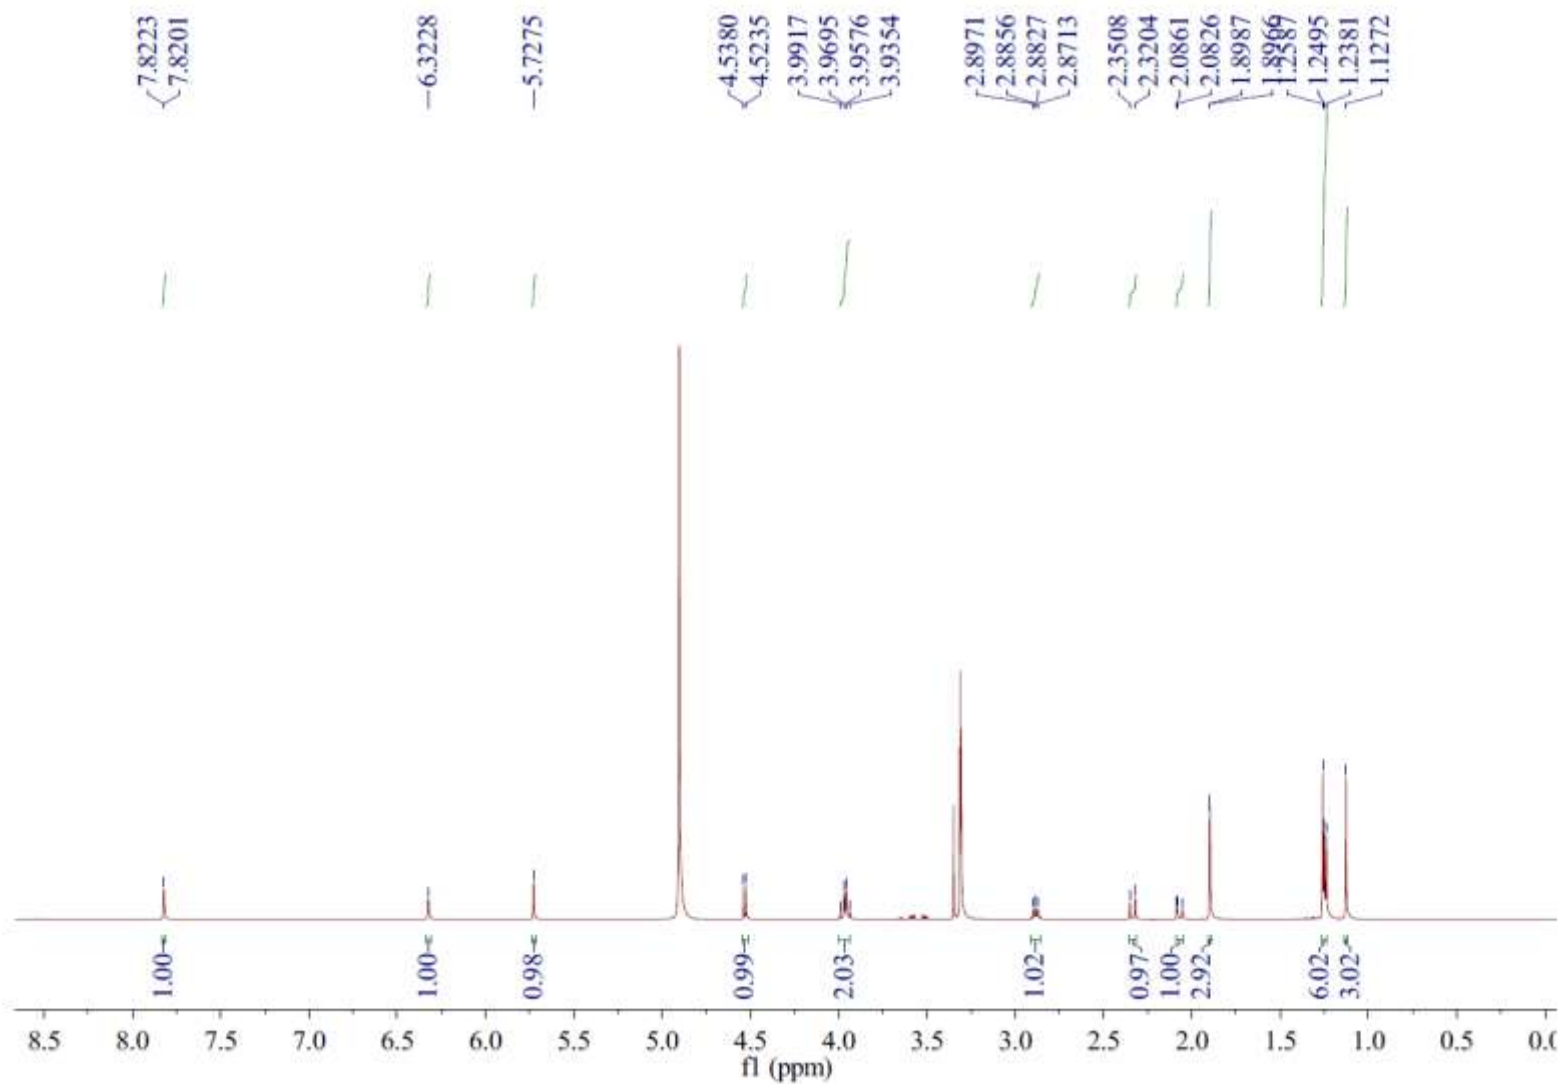

**Figure S16.** The  $^{13}\text{C}$  NMR spectrum of crotonol B (**2**) in  $\text{CD}_3\text{OD}$

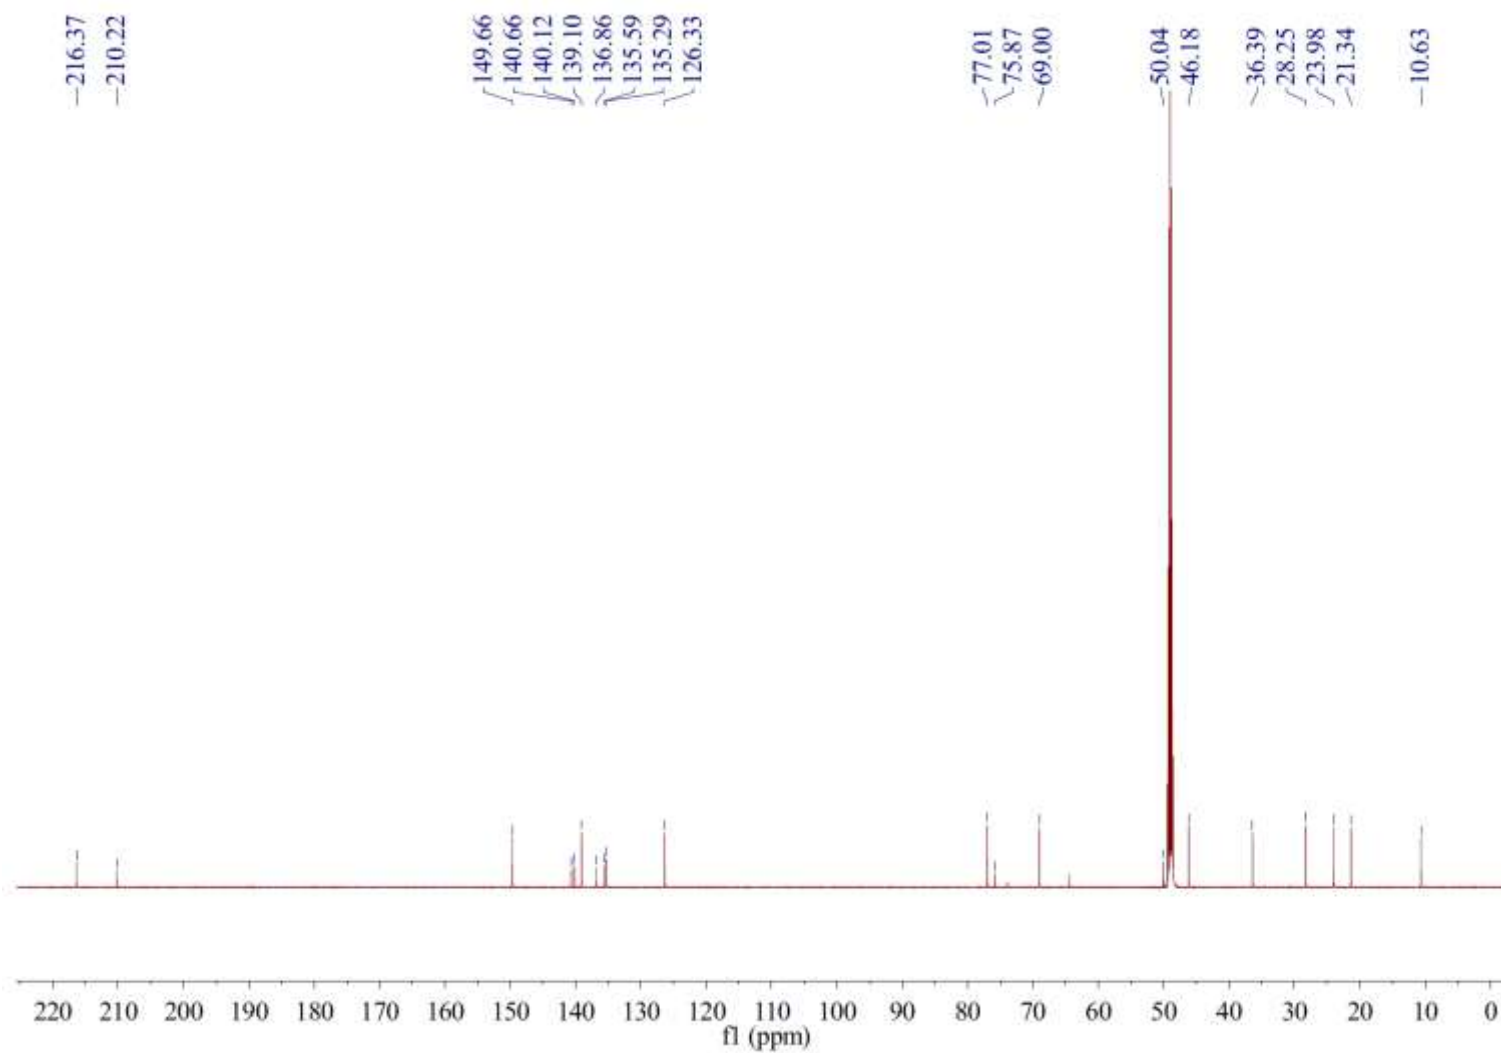

**Figure S17.** The HSQC spectrum of crotonol B (**2**) in CD<sub>3</sub>OD

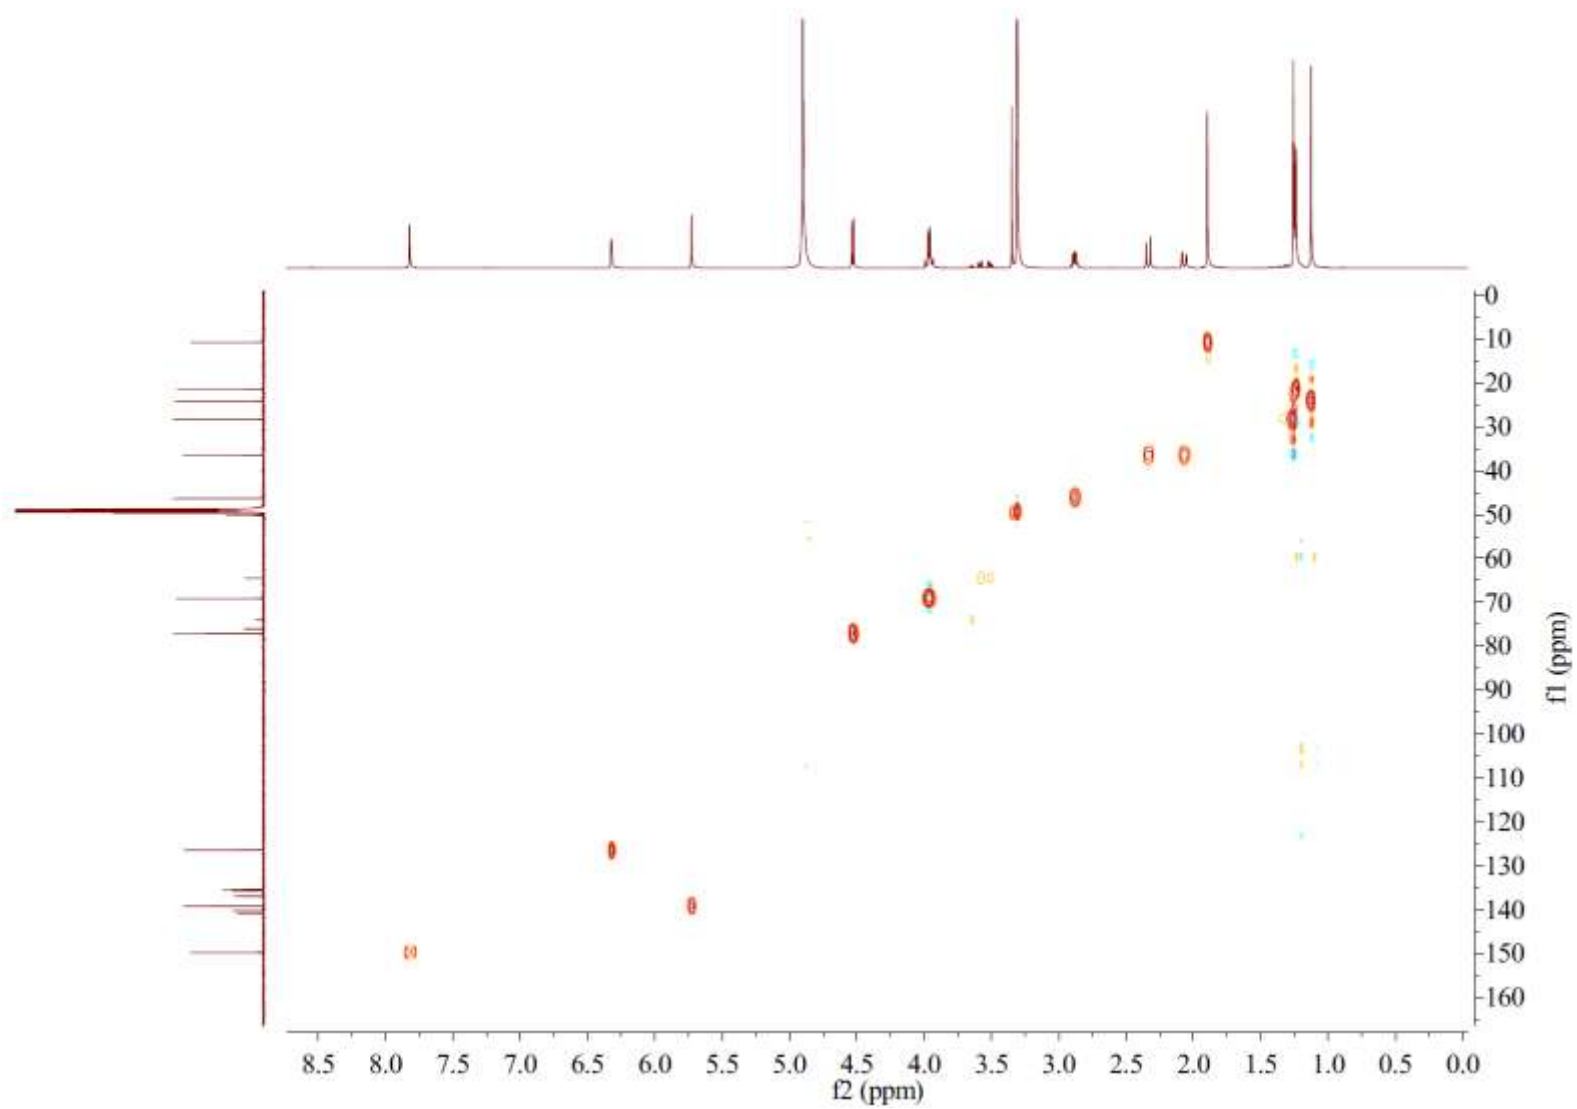

**Figure S18.** The  $^1\text{H}$ - $^1\text{H}$  COSY spectrum of crotonol B (**2**) in  $\text{CD}_3\text{OD}$

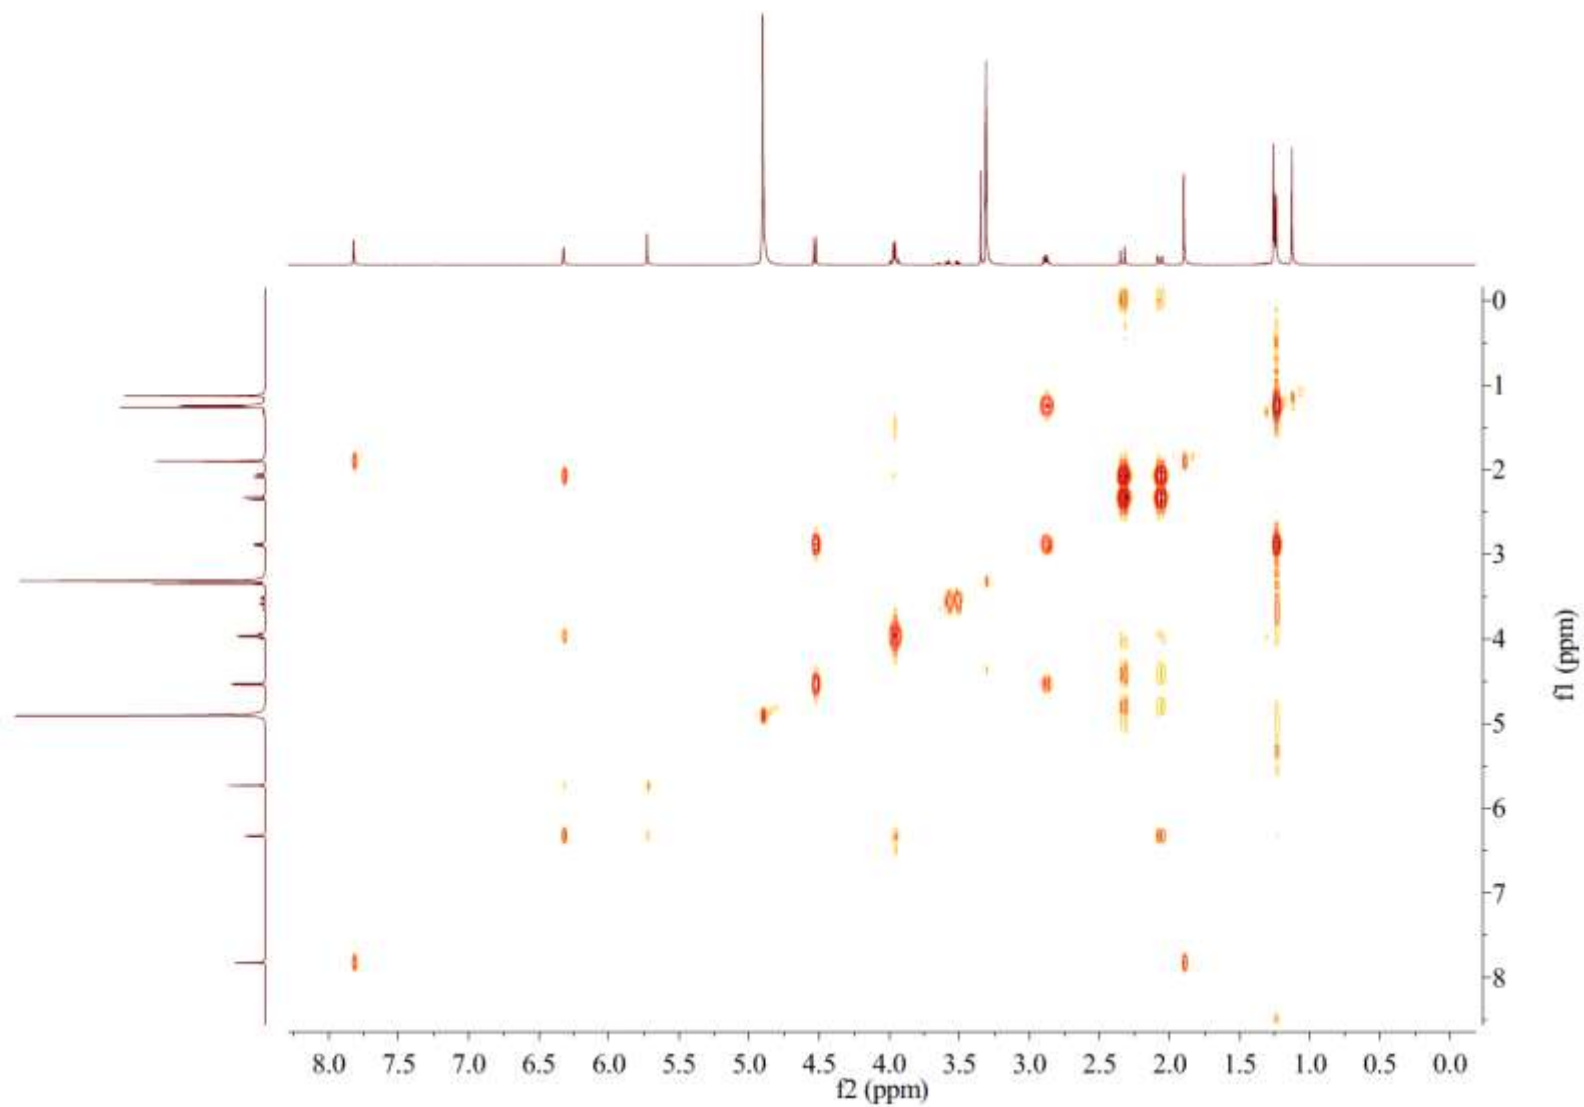

**Figure S19.** The HMBC spectrum of crotonol B (**2**) in CD<sub>3</sub>OD

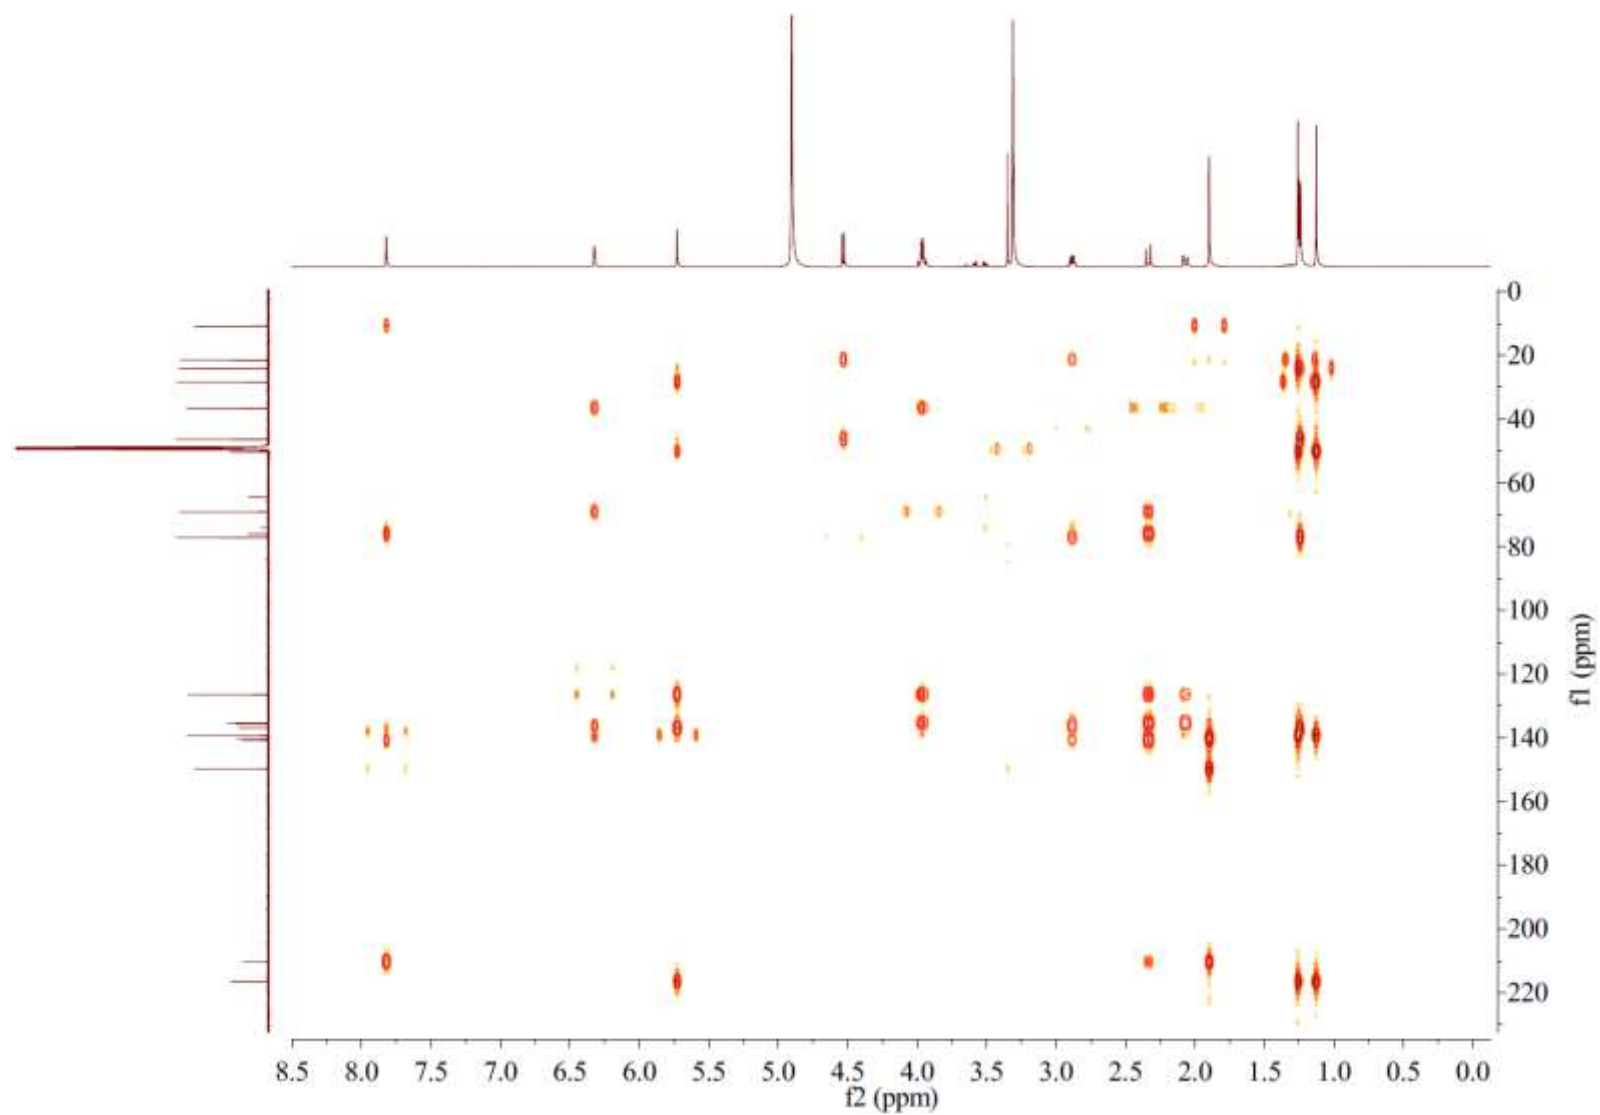

**Figure S20.** The enlarged HMBC spectrum of crotonol B (**2**) about correlation H12/C13

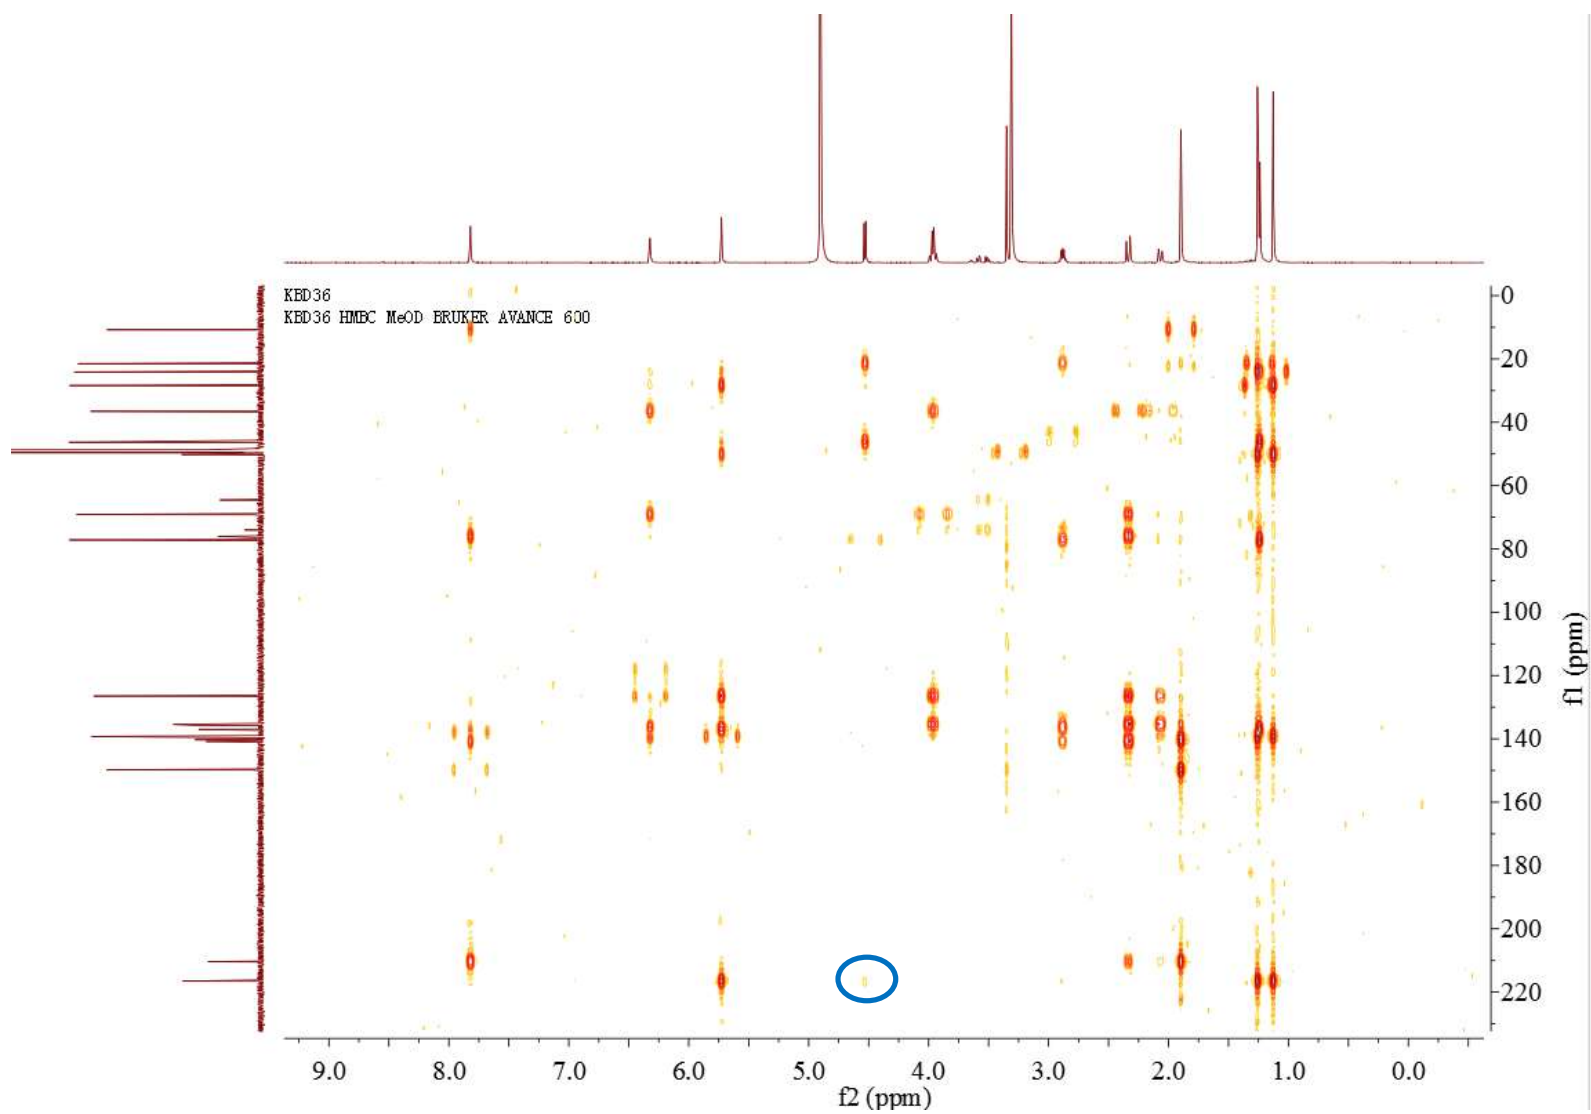

Figure S21. The enlarged HMBC spectrum of 2 between 135 and 141 ppm

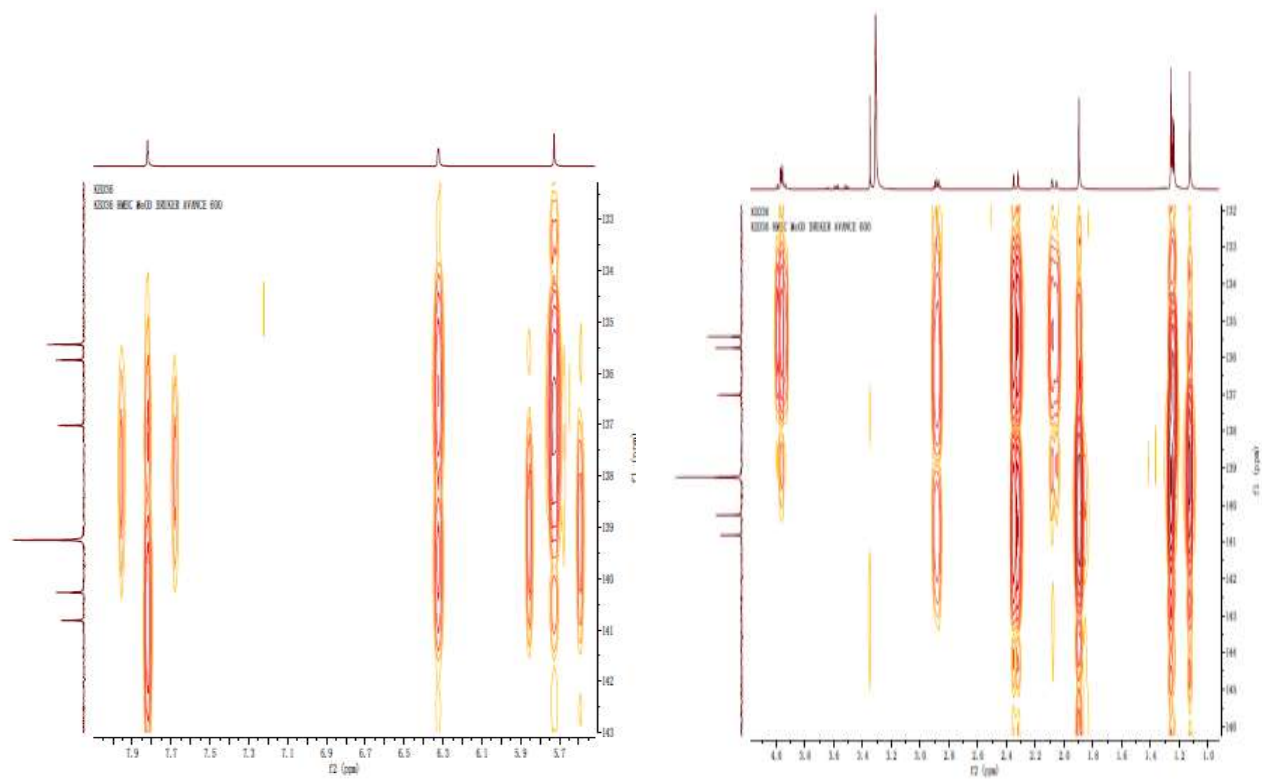

**Figure S22.** The NOESY spectrum of crotonol B (**2**) in CD<sub>3</sub>OD

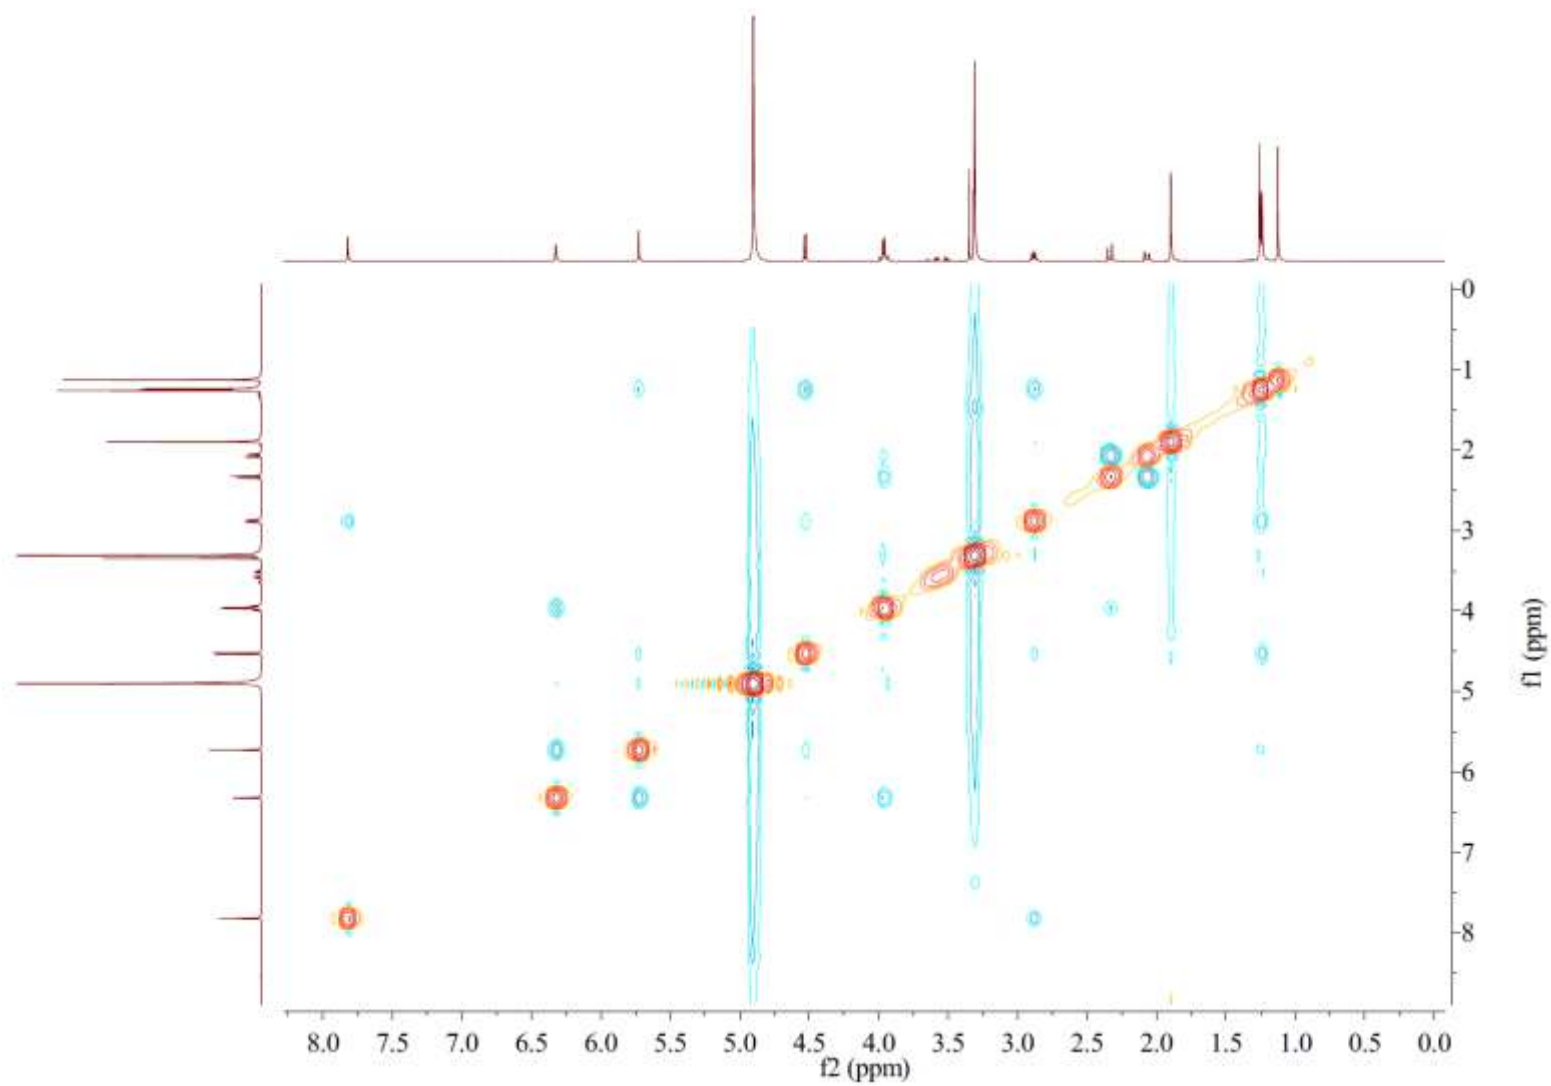



Figure S23. The HRESIMS spectrum of crotonol B (2)

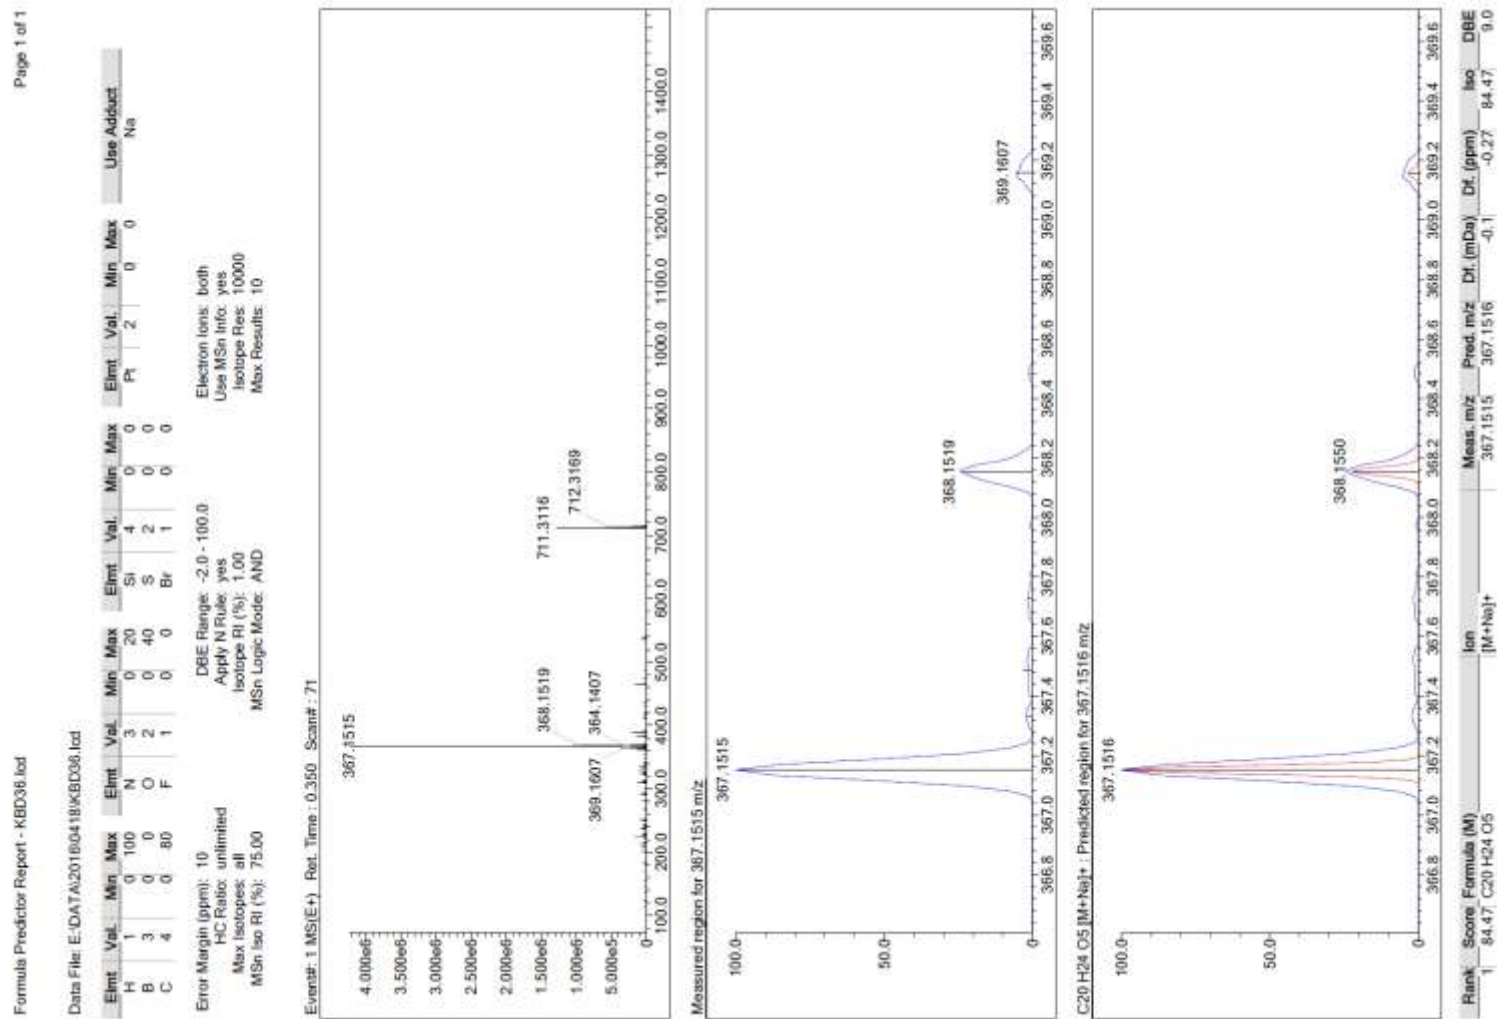

Figure S24. The UV spectrum of crotonol B (2) in MeOH

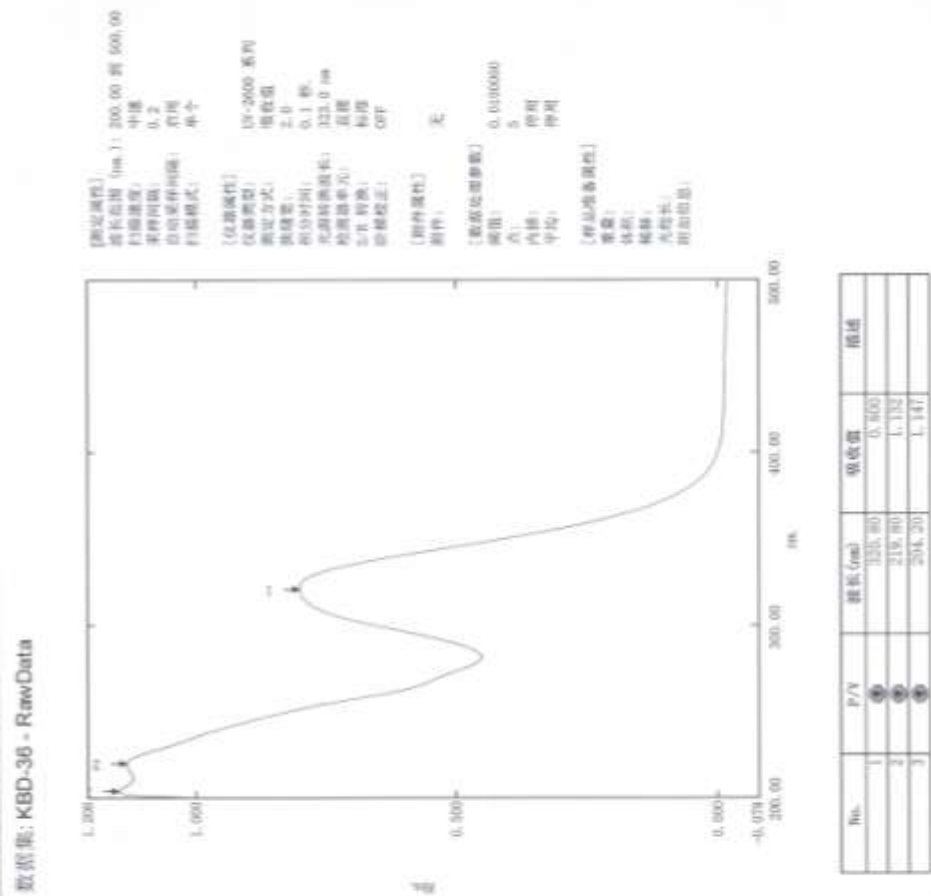

Figure S25. The MMFF calculations picture between H-11 and H-12

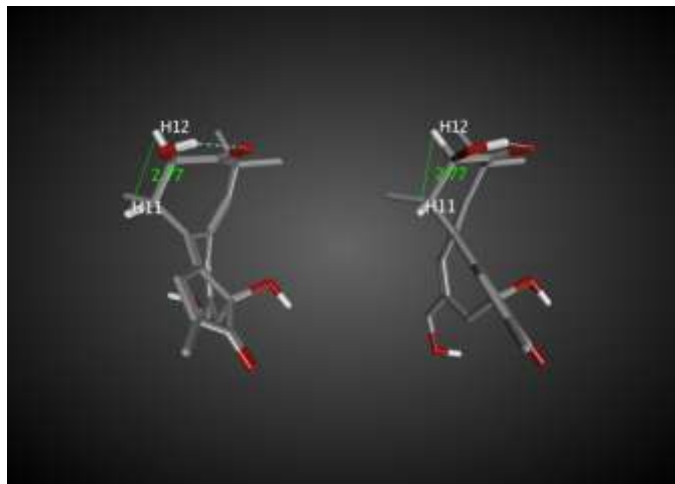

Supplement: c8ob02519c1.pdf [file c8ob02519c1.pdf]
